# Supplementary material for: Clathrin-independent endocytic retrieval of SV proteins mediated by the clathrin adaptor AP-2 at mammalian central synapses
Source: eLife journal article supplement (doi:10.7554/elife.71198), 2021-12-29

Figure 2\_figure Supplement 1C- Blot

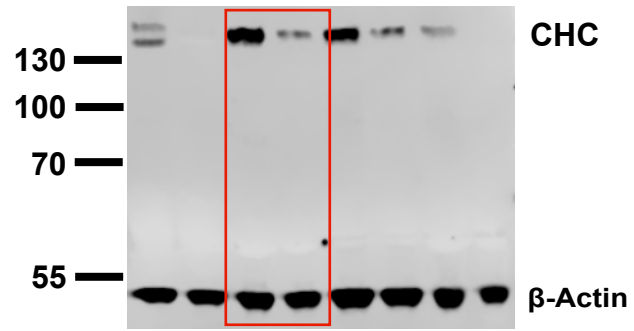

Supplement: fig2-figsupp1-data2 [file elife-71198-fig2-figsupp1-data2-v1.pdf]
