# Supplementary material for: Clathrin-independent endocytic retrieval of SV proteins mediated by the clathrin adaptor AP-2 at mammalian central synapses
Source: eLife journal article supplement (doi:10.7554/elife.71198), 2021-12-29

# Figure 6 Blots

Figure 6B

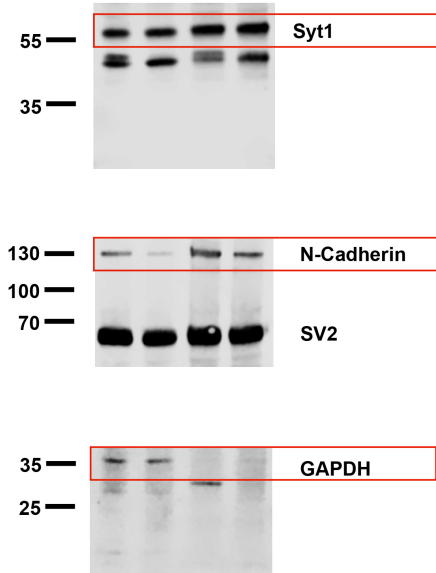

Figure 6D

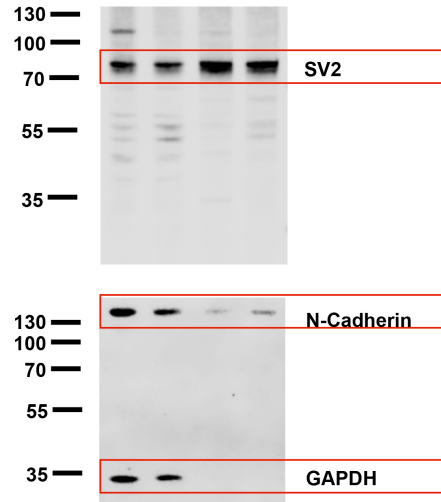

Figure 6F

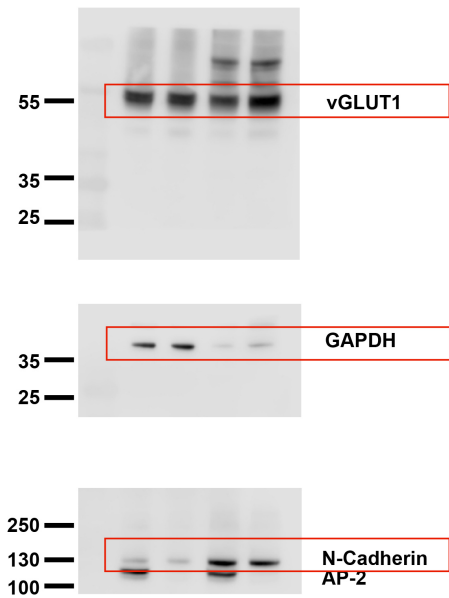

Figure 6H

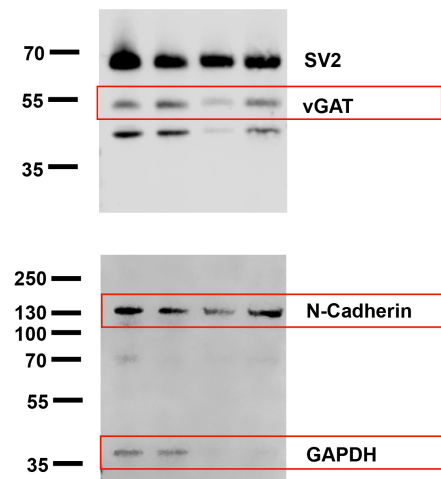

Supplement: fig6-data2 [file elife-71198-fig6-data2-v1.pdf]
