# Supplementary material for: Clathrin-independent endocytic retrieval of SV proteins mediated by the clathrin adaptor AP-2 at mammalian central synapses
Source: eLife journal article supplement (doi:10.7554/elife.71198), 2021-12-29

Figure 8B and C, and figure supplement 6A - Blots

### AP-1

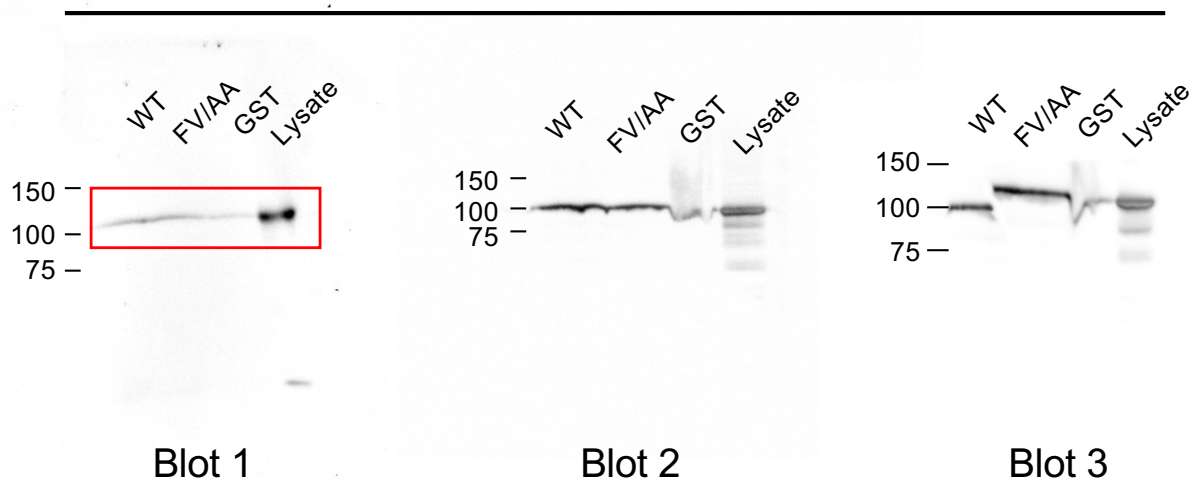

### AP-2

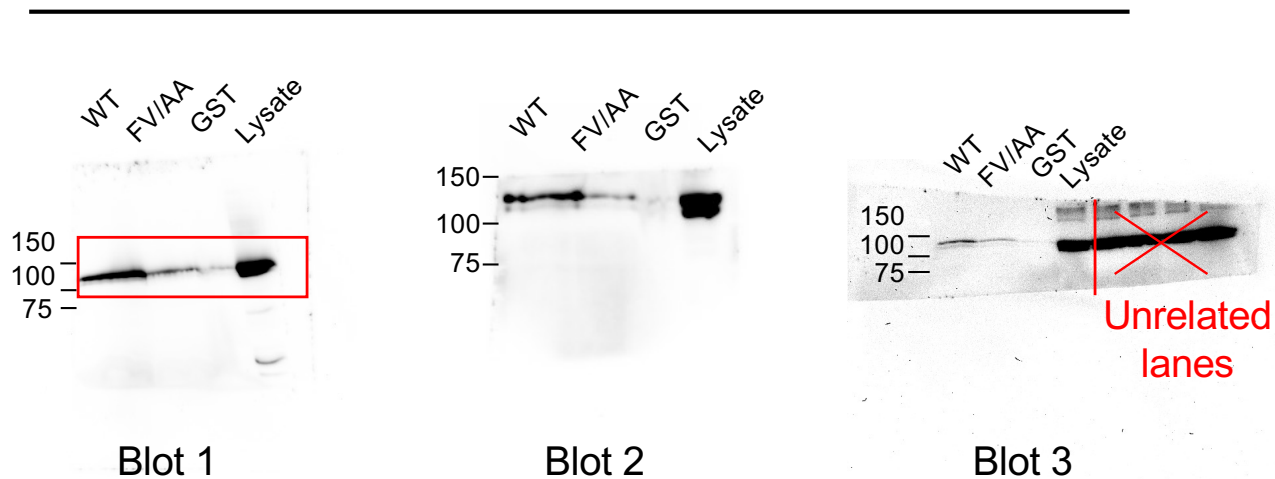

### AP-3

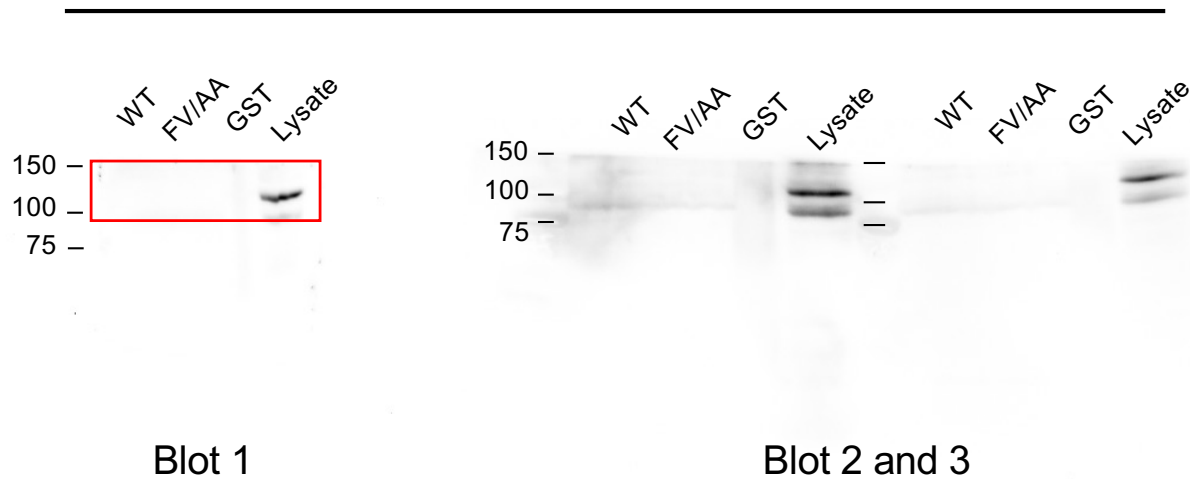

Supplement: fig8-data2 [file elife-71198-fig8-data2-v1.pdf]
