# Supplementary material for: Clathrin-independent endocytic retrieval of SV proteins mediated by the clathrin adaptor AP-2 at mammalian central synapses
Source: eLife. 2022 Jan 11;11:e71198. doi: 10.7554/eLife.71198 (PMC8752090; doi:10.7554/eLife.71198)
Supplement: Figure 2—figure supplement 1—source data 1. [file elife-71198-fig2-figsupp1-data1.xlsx]

## Sheet: Sheet1
F
			Figure 2-figure supplement 1B					Figure 2-figure supplement 1D					Figure 2-figure supplement 1F							Figure 2-figure supplement 1G						Figure 2-figure supplement 1H						Figure 2-figure supplement 1I						Figure 2-figure supplement 1J
																					Syp pHluorin Trace					Syp Tau							VGLUT1 pHluorin Trace					VGLUT1 Tau
			shCTRL	shCHC				shCtrl	shCHC				WT	WT + Pitstop2
			1.05534	0.236766				1	0.304235				1	0.191216							shCTRL	shCHC				shCTRL	shCHC						shCTRL	shCHC				shCTRL	shCHC
			1.02896	0.323643				1	0.274465				1	0.38915						1	0.022709	0.015061				22.5838	29.7252					1	0.016636	-0.00224				17.0929	41.5784
			0.886519	0.296572				1	0.32291				1	0.185727						2	0.021029	-0.01656				12.8215	37.62					2	0.004079	-0.01269				22.1292	51.2492
			1.02919	0.146351									1	0.032743						3	0.028571	-0.00316				12.8239	51.3826					3	0.017201	-0.02096				16.5885	49.8849
																				4	0.004093	0.015243				25.7576	44.0404					4	0.013217	-0.00996				37.7734	51.0927
																				5	-0.00642	-0.00699										5	0.011099	-0.02173				31.7101
			Unpaired t test																	6	-0.01043	0.017307										6	0.012174	-0.01926
			P value	<0,0001				One sample t test					One sample t test							7	0.002689	-0.01496										7	0.014091	-0.02599
																				8	-0.00102	-0.01494				Unpaired t test						8	-0.00087	-0.00693
								P value (two tailed)		0.0004			P value (two tailed)		0.0016					9	-0.01368	-0.03686				P value	0.008					9	0.004412	-0.01527
		n=	4	4																10	0	0										10	0	0				Unpaired t test
																				11	-0.00569	-0.01792										11	-0.00765	0.006415				P value	0.0027
																				12	-0.01054	-0.00533			n=	4	4					12	0.000127	-0.01147
																				13	0.068269	0.001957										13	0.050337	0.02103
																				14	0.11979	0.033315										14	0.096869	0.056677
																				15	0.158332	0.062863										15	0.142872	0.08753			n=	5	4
																				16	0.216672	0.134996										16	0.192857	0.099019
																				17	0.276662	0.226501										17	0.234768	0.155202
																				18	0.333578	0.272675										18	0.270514	0.174502
																				19	0.373734	0.307898										19	0.317985	0.19971
																				20	0.448206	0.360975										20	0.353604	0.224503
																				21	0.471948	0.377244										21	0.400301	0.250428
																				22	0.494475	0.433616										22	0.432425	0.298232
																				23	0.541075	0.485161										23	0.473864	0.353221
																				24	0.583599	0.491087										24	0.50314	0.363665
																				25	0.607165	0.542046										25	0.530213	0.415351
																				26	0.634613	0.575037										26	0.559217	0.443877
																				27	0.671167	0.578649										27	0.591438	0.491338
																				28	0.73452	0.668526										28	0.609028	0.519803
																				29	0.742424	0.672168										29	0.639408	0.554669
																				30	0.775187	0.746039										30	0.663066	0.574956
																				31	0.78096	0.769701										31	0.687379	0.618179
																				32	0.827252	0.742282										32	0.718569	0.647886
																				33	0.829437	0.797118										33	0.734521	0.688948
																				34	0.84238	0.80244										34	0.75	0.702872
																				35	0.848564	0.830789										35	0.765547	0.75626
																				36	0.87914	0.871079										36	0.785766	0.771735
																				37	0.910814	0.856328										37	0.80954	0.792705
																				38	0.882379	0.857687										38	0.829581	0.831888
																				39	0.883379	0.853521										39	0.847651	0.832804
																				40	0.898022	0.883255										40	0.867382	0.857556
																				41	0.905695	0.932766										41	0.888584	0.877747
																				42	0.916076	0.928342										42	0.901257	0.889227
																				43	0.921642	0.945023										43	0.924578	0.888751
																				44	0.945209	0.971688										44	0.928345	0.918148
																				45	0.955244	0.984547										45	0.947119	0.924466
																				46	0.97497	0.992656										46	0.956693	0.920347
																				47	0.974182	1										47	0.968647	0.945753
																				48	1	0.974539										48	0.983537	0.978784
																				49	0.995893	0.986263										49	0.982643	0.981718
																				50	0.999581	0.979058										50	0.988131	1
																				51	0.976739	0.993192										51	1	0.99673
																				52	0.981467	0.992523										52	0.994594	0.974717
																				53	0.918156	0.980249										53	0.97029	0.983391
																				54	0.875481	0.958308										54	0.930827	0.959027
																				55	0.840434	0.950933										55	0.889607	0.946103
																				56	0.78251	0.891151										56	0.853977	0.917266
																				57	0.746493	0.86448										57	0.822901	0.902707
																				58	0.706682	0.848482										58	0.784686	0.854639
																				59	0.663464	0.817326										59	0.74877	0.831031
																				60	0.623255	0.794607										60	0.716909	0.822489
																				61	0.600165	0.818242										61	0.687413	0.813934
																				62	0.550026	0.727863										62	0.656884	0.771652
																				63	0.540301	0.702314										63	0.621856	0.769652
																				64	0.50967	0.697356										64	0.590904	0.756298
																				65	0.485551	0.671925										65	0.55877	0.740396
																				66	0.458195	0.626629										66	0.548881	0.722494
																				67	0.427372	0.600462										67	0.519161	0.700288
																				68	0.399505	0.59057										68	0.495811	0.658563
																				69	0.374702	0.580043										69	0.479871	0.65021
																				70	0.345915	0.616492										70	0.4558	0.661481
																				71	0.348096	0.572871										71	0.439838	0.629054
																				72	0.297922	0.548395										72	0.425131	0.609562
																				73	0.311564	0.525691										73	0.404529	0.613484
																				74	0.275103	0.533402										74	0.382496	0.582866
																				75	0.276868	0.505173										75	0.378106	0.575893
																				76	0.245346	0.523949										76	0.353898	0.564428
																				77	0.226893	0.51227										77	0.34461	0.557553
																				78	0.217277	0.470793										78	0.320731	0.556329
																				79	0.231222	0.464474										79	0.31461	0.534062
																				80	0.213974	0.434804										80	0.299384	0.511879
																				81	0.218053	0.39593										81	0.291476	0.503072
																				82	0.197684	0.415549										82	0.272413	0.511644
																				83	0.167028	0.404553										83	0.269203	0.483563
																				84	0.181299	0.365581										84	0.26028	0.479868
																				85	0.143683	0.406264										85	0.248195	0.453198
																				86	0.138551	0.38645										86	0.237744	0.463334
																				87	0.117676	0.375978										87	0.224698	0.441678
																				88	0.103794	0.386518										88	0.22118	0.450494
																				89	0.103518	0.391966										89	0.210379	0.442111
																				90	0.116526	0.377935										90	0.211971	0.421449
																				91	0.098712	0.333375										91	0.200783	0.413635
																				92	0.063789	0.347647										92	0.199019	0.398803
																				93	0.073789	0.3344										93	0.196285	0.397344
																				94	0.062519	0.322444										94	0.174011	0.383807
																				95	0.081691	0.337037										95	0.174258	0.373508
																				96	0.063249	0.313105										96	0.157903	0.372665
																				97	0.064808	0.24593										97	0.156906	0.373519
																				98	0.047682	0.27029										98	0.151997	0.398289
																				99	0.028397	0.293024										99	0.144566	0.377868
																				100	0.046468	0.281329										100	0.1443	0.363894
																				101	0.042563	0.276778										101	0.138095	0.347198
																				102	0.024893	0.29182										102	0.132164	0.355049
																				103	0.022676	0.249817										103	0.129151	0.331422
																				104	0.002349	0.282889										104	0.121588	0.333483
																				105	-0.00691	0.220031										105	0.117667	0.336175
																				106	0.012254	0.296546										106	0.110453	0.345486
																				107	0.017964	0.291241										107	0.107993	0.312205
																				108	0.002218	0.226684										108	0.098801	0.309653
																				109	4.4e-05	0.191288										109	0.100583	0.321419
																				110	-0.00425	0.268834										110	0.097783	0.310939
																				111	-0.02354	0.213083										111	0.086438	0.303425
																				112	-0.00559	0.234894										112	0.093168	0.299553
																				113	-0.0254	0.205119										113	0.08216	0.289379
																				114	-0.00997	0.228291										114	0.078662	0.276317
																				115	-0.05218	0.174845										115	0.06998	0.273319
																				116	-0.03146	0.204201										116	0.068549	0.27184
																				117	-0.05109	0.264165										117	0.06448	0.262683
																				118	-0.03638	0.211681										118	0.062336	0.269392
																				119	-0.05846	0.21549										119	0.054431	0.266591
																				120	-0.03521	0.219054										120	0.054907	0.260028
																				121	-0.06005	0.227457										121	0.050478	0.245889
																				122	-0.0305	0.233491										122	0.052824	0.226789
																				123	-0.07249	0.220528										123	0.050309	0.252132
																				124	-0.04666	0.203622										124	0.03836	0.232955
																				125	-0.04751	0.1803										125	0.038572	0.229579
																				n=	4	4
