# Supplementary material for: Clathrin-independent endocytic retrieval of SV proteins mediated by the clathrin adaptor AP-2 at mammalian central synapses
Source: eLife. 2022 Jan 11;11:e71198. doi: 10.7554/eLife.71198 (PMC8752090; doi:10.7554/eLife.71198)
Supplement: Figure 2—source data 1. [file elife-71198-fig2-data1.xlsx]

## Sheet: Sheet1
	Figure 2B						Figure 2C				Figure 2D					Figure 2E				Figure 2F					Figure 2G				Figure 2H					Figure 2I				Figure 2J				Figure 2K				Figure 2L
							Syt1 pHluorin Trace				Syt1 Tau					SV2 pHluorin Trace				SV2 Tau					VGLUT1 pHluorin Trace				VGUT1 Tau					VGAT pHluorin Trace				VGAT Tau				Syp pHluorin Trace				Syp Tau
							shCTRL	shCHC			shCTRL	shCHC				shCTRL	shCHC			shCTRL	shCHC				shCTRL	shCHC			shCTRL	shCHC				shCTRL	shCHC			shCTRL	shCHC			shCTRL	shCHC			shCTRL	shCHC
	shCtrl	shCHC				1	0.090106	0.085769			10.044	27.0166			1	0.012499	0.000594			26.5849	35.8756			1	0.029745	0.063421			12.3682	17.5247			1	0.019254	0.069472			18.8128	12.1849		1	0.025915	0.040505			29.668	13.7085
	1	0.086894				2	0.041812	0.02931			11.6788	11.4329			2	0.00097	0.016476			12.9679	24.033			2	0.014331	0.047381			16.1383	25.8767			2	0.002507	0.029285			22.875	17.0924		2	0.007351	0.03236			25.3926	25.7355
	1	0.103105				3	0.029208	0.028392			16.442	14.3158			3	-0.01097	-0.01015			19.6867	14.447			3	0.005143	-0.00682			16.7083	16.7992			3	-0.02491	0.025479			6.85632	12.9379		3	0.013613	0.003277			14.4706	35.25
	1	0.110737				4	0.030696	0.009746			4.69065	13.6295			4	-0.01723	0.01081			12.763	30.0052			4	0.006742	-0.01021			16.4696	40.8154			4	-0.03534	0.012731			19.0645	12.4619		4	0.005523	0.017541			17.5978	16.3171
	1	0.309727				5	0.016348	0.015788			12.6154	15.6746			5	-0.01575	-0.01698			45.927	8.72835			5	-0.00916	0.007408			12.3158	22.487			5	-0.01733	0.034815			7.82852	10.1553		5	0.007501	0.001664			13.7856	13.3887
	1	0.337143				6	0.006285	0.011659			19.6459	18.5504			6	-0.00667	-0.01409			21.3044	8.76351			6	0.002574	0.003744			22.445	6.09804			6	-0.01174	0.005296			5.72803	16.9177		6	0.003181	0.008943			16.7268	11.0346
	1	0.363445				7	0.01323	0.00509			14.3798	7.22152			7	-0.01946	-0.02068			12.9848	16.0454			7	-0.00149	0.003141			27.2419	15.9353			7	-0.00751	0.003992			8.33098	9.16966		7	-0.00392	0.01412			16.4982	27.2981
						8	0.00013	-0.00103			28.6468	11.7618			8	-0.01102	-0.01475			9.38399	65.21			8	-0.00285	0.002437							8	-0.01638	-0.00292			11.4282	11.0425		8	-0.00165	0.016758			15.0723	27.4608
	One sample t test					9	0.003986	-0.003			8.35388	29.0729			9	-0.01174	-0.00596			51.399	36.4921			9	-0.01328	-0.01711							9	-0.02043	0.012091			22.7983	12.4617		9	-0.00859	0.010409
						10	0	0			14.1203	13.1638			10	0	0			8.32734	29.8378			10	0	0			Unpaired t test				10	0	0			16.838	22.3561		10	0	0
	P value (two tailed)		<0,0001			11	0.006169	-0.00061			10.962	11.5574			11	0.004283	0.010199			11.7827	17.9476			11	-0.00618	0.014217			P value	0.5063			11	0.003655	0.008771			14.2433	9.19043		11	0.012669	0.007503
						12	0.004788	-0.00346			19.2674	14.1827			12	-4.73e-06	0.020406			20.6048	15.2118			12	-0.00238	-0.00242							12	-0.03014	0.044751			22.3709	20.224		12	0.005452	0.001998			Unpaired t test
						13	0.371247	0.490972			23.6445	5.74931			13	0.281744	0.234871			12.2245	18.0892			13	0.17501	0.211882							13	0.289093	0.348732			28.5751	19.6401		13	0.15948	0.130057			P value	0.4907
						14	0.626596	0.758754			18.5176				14	0.549763	0.508952			14.1201	16.4975			14	0.444175	0.559125		n=	7	7			14	0.562151	0.60786				15.4787		14	0.332996	0.325054
						15	0.811945	0.929672			12.0034				15	0.755835	0.740087				15.9482			15	0.683086	0.747844							15	0.71835	0.782435						15	0.478449	0.485906
						16	0.945489	0.990877			13.1171				16	0.888575	0.889618				20.1448			16	0.883146	0.882828							16	0.882546	0.932893						16	0.62882	0.677064		n=	8	8
						17	1	1			17.7174				17	0.992324	1				18.839			17	0.975414	0.997839							17	0.994025	1			Unpaired t test			17	0.719107	0.775163
						18	0.968906	0.919176			12.8384				18	1	0.999673							18	1	1							18	1	0.974647			P value	0.5337		18	0.805385	0.85817
						19	0.917657	0.845			20.5061				19	0.96255	0.962862							19	0.96615	0.991295							19	0.936019	0.930331						19	0.884973	0.882114
						20	0.843027	0.801532							20	0.90917	0.918869			Unpaired t test				20	0.917579	0.930092							20	0.907013	0.883872						20	0.957397	0.924058
						21	0.775887	0.732377							21	0.864975	0.859845			P value	0.5333			21	0.864557	0.865628							21	0.844808	0.849124		n=	13	14		21	1	0.989025
						22	0.722171	0.644932			Unpaired t test				22	0.81471	0.821268							22	0.813562	0.82219							22	0.817673	0.782491						22	0.99979	1
						23	0.664315	0.590258			P value	0.875			23	0.766737	0.757702							23	0.772668	0.767057							23	0.746537	0.77327						23	0.9878	0.922248
						24	0.617249	0.541335							24	0.713384	0.69564		n=	14	17			24	0.731506	0.698801							24	0.719855	0.704558						24	0.930266	0.866759
						25	0.579338	0.505374							25	0.68254	0.673443							25	0.692772	0.698626							25	0.675498	0.658489						25	0.870775	0.795724
						26	0.540499	0.477315		n=	19	13			26	0.639857	0.631798							26	0.65098	0.642594							26	0.625663	0.610042						26	0.814653	0.730237
						27	0.497286	0.44379							27	0.593525	0.597257							27	0.617718	0.629928							27	0.589323	0.585279						27	0.761135	0.702631
						28	0.456195	0.39818							28	0.555453	0.565484							28	0.59067	0.605157							28	0.580976	0.542717						28	0.716614	0.645525
						29	0.440495	0.373608							29	0.532246	0.522108							29	0.541654	0.559935							29	0.529252	0.512097						29	0.669926	0.616406
						30	0.404301	0.339696							30	0.487591	0.48873							30	0.497921	0.506324							30	0.484002	0.469522						30	0.632669	0.575727
						31	0.376173	0.325897							31	0.466651	0.470306							31	0.474136	0.499018							31	0.470878	0.439855						31	0.600417	0.536362
						32	0.350041	0.275002							32	0.438407	0.433031							32	0.453213	0.501667							32	0.444696	0.417375						32	0.571582	0.514834
						33	0.321533	0.280047							33	0.417652	0.405667							33	0.432777	0.462888							33	0.411468	0.386752						33	0.539702	0.488594
						34	0.299943	0.268891							34	0.381313	0.388366							34	0.394271	0.442704							34	0.395723	0.371581						34	0.492454	0.46991
						35	0.281858	0.240927							35	0.364378	0.376133							35	0.370545	0.413695							35	0.358749	0.349597						35	0.467216	0.446821
						36	0.268986	0.22032							36	0.346056	0.35441							36	0.352186	0.405851							36	0.328211	0.336765						36	0.460451	0.430101
						37	0.258783	0.199862							37	0.323994	0.338172							37	0.32312	0.38119							37	0.299394	0.294233						37	0.433418	0.414435
						38	0.23702	0.181966							38	0.315281	0.315762							38	0.318492	0.377457							38	0.263492	0.303711						38	0.403083	0.384593
						39	0.221758	0.18509							39	0.295952	0.288021							39	0.297991	0.393907							39	0.2528	0.267861						39	0.386425	0.347232
						40	0.208702	0.15095							40	0.276058	0.292247							40	0.278877	0.345016							40	0.270564	0.22751						40	0.360125	0.34468
						41	0.196126	0.16003							41	0.264044	0.281703							41	0.258869	0.317014							41	0.243983	0.235828						41	0.344689	0.339803
						42	0.190565	0.135706							42	0.247877	0.252997							42	0.243151	0.296007							42	0.217897	0.206362						42	0.324617	0.327737
						43	0.18159	0.139653							43	0.230344	0.260713							43	0.218977	0.316417							43	0.215284	0.194488						43	0.312426	0.317746
						44	0.161939	0.125289							44	0.218684	0.246608							44	0.212239	0.28423							44	0.182345	0.203686						44	0.297962	0.281914
						45	0.167022	0.123356							45	0.201345	0.239475							45	0.198746	0.25266							45	0.170979	0.176461						45	0.281962	0.268792
						46	0.147646	0.106936							46	0.202197	0.234114							46	0.193012	0.272552							46	0.140278	0.168471						46	0.268419	0.26771
						47	0.137074	0.112262							47	0.188489	0.21407							47	0.174558	0.252161							47	0.155684	0.141834						47	0.257964	0.239441
						48	0.115072	0.070311							48	0.185232	0.213948							48	0.160411	0.247757							48	0.160088	0.127605						48	0.245573	0.243033
						49	0.111212	0.076782							49	0.165765	0.191687							49	0.150097	0.226735							49	0.113423	0.087459						49	0.239195	0.238313
						50	0.114278	0.082176							50	0.154334	0.187281							50	0.14457	0.215124							50	0.108394	0.083092						50	0.220483	0.21164
						51	0.103359	0.090874							51	0.151402	0.189383							51	0.140492	0.187936							51	0.114242	0.080293						51	0.204649	0.211454
						52	0.097972	0.091005							52	0.140429	0.170136							52	0.136888	0.225822							52	0.094074	0.05381						52	0.188933	0.196333
						53	0.091114	0.053439							53	0.134295	0.173566							53	0.113344	0.196869							53	0.093641	0.060731						53	0.175297	0.203795
						54	0.080871	0.059407							54	0.136621	0.164816							54	0.11513	0.183236							54	0.080984	0.033667						54	0.174182	0.187435
						55	0.085154	0.063813							55	0.126	0.165986							55	0.102694	0.152659							55	0.064785	0.0473						55	0.165381	0.179089
						56	0.068527	0.050728							56	0.121991	0.162038							56	0.100997	0.147392							56	0.042137	0.009184						56	0.147227	0.175448
						57	0.058495	0.045508							57	0.118993	0.146353							57	0.096915	0.162165							57	0.051364	0.040947						57	0.135185	0.159351
						58	0.055731	0.040702							58	0.115692	0.131914							58	0.097845	0.162755							58	0.027715	0.022659						58	0.140021	0.143432
						59	0.047657	0.041712							59	0.107687	0.129445							59	0.073552	0.132727							59	0.016829	0.009014						59	0.136535	0.153095
						60	0.048033	0.042404							60	0.102113	0.130147							60	0.089472	0.125477							60	-0.00296	-0.01224						60	0.119495	0.134922
						61	0.041842	0.035979							61	0.095606	0.12587							61	0.0905	0.12297							61	0.01025	-0.03165						61	0.120311	0.141004
						62	0.038564	0.027904							62	0.094042	0.110723							62	0.082626	0.104508							62	0.009148	-0.0307						62	0.112982	0.138898
						63	0.032271	0.032154							63	0.100042	0.119658							63	0.083934	0.10406							63	-0.00462	-0.02166						63	0.104919	0.12479
						64	0.028909	0.007655							64	0.08467	0.124551							64	0.061417	0.12222							64	-0.02103	-0.0326						64	0.091675	0.109915
						65	0.025138	0.014145							65	0.08151	0.116769							65	0.060402	0.105847							65	-0.02376	-0.02562						65	0.085379	0.12517
						66	0.017727	0.026355							66	0.077585	0.104908							66	0.06659	0.112313							66	-0.0314	-0.04252						66	0.084187	0.125834
						67	0.011501	0.012209							67	0.081429	0.098551							67	0.063921	0.125494							67	-0.04367	-0.03168						67	0.086018	0.111748
						68	-0.00134	0.02677							68	0.074586	0.086804							68	0.052841	0.065712							68	-0.06832	-0.05983						68	0.070764	0.101728
						69	0.006257	0.005372							69	0.074347	0.095429							69	0.062322	0.089075							69	-0.0505	-0.06346						69	0.06985	0.090844
						70	-0.00122	0.001945							70	0.072185	0.097359							70	0.047958	0.0927							70	-0.05769	-0.07883						70	0.072667	0.089326
						71	-0.00848	0.000278							71	0.062277	0.087455							71	0.038148	0.094015							71	-0.06913	-0.09744						71	0.064411	0.090163
						72	-0.02806	-0.01132							72	0.052947	0.097622							72	0.043022	0.065333							72	-0.05934	-0.07162						72	0.069441	0.085814
						73	-0.0127	-0.00172							73	0.056483	0.078288							73	0.042302	0.037126							73	-0.06572	-0.09596						73	0.062159	0.080387
						74	-0.02194	-0.00404							74	0.057821	0.082336							74	0.044512	0.071434							74	-0.08168	-0.09368						74	0.058946	0.080098
						75	-0.0313	-0.0069							75	0.057819	0.076623							75	0.046359	0.055276							75	-0.0826	-0.11151						75	0.054039	0.076328
						76	-0.02902	-0.02604							76	0.051377	0.086395							76	0.047874	0.058707							76	-0.09505	-0.09769						76	0.059258	0.06416
						77	-0.04378	-0.02745							77	0.049857	0.068589							77	0.042282	0.040837							77	-0.08005	-0.13125						77	0.056417	0.06154
						78	-0.03734	-0.02507							78	0.048009	0.081272							78	0.037031	0.060363							78	-0.08387	-0.12453						78	0.054552	0.060701
						79	-0.04496	-0.02557							79	0.04222	0.062819							79	0.024259	0.040612							79	-0.09927	-0.12117						79	0.052712	0.059919
						80	-0.04918	-0.02803							80	0.043346	0.066042							80	0.031905	0.030896							80	-0.10714	-0.13789						80	0.05224	0.061429
						81	-0.06401	-0.04617							81	0.038424	0.062764							81	0.016688	0.01781							81	-0.11222	-0.14194						81	0.042442	0.063588
						82	-0.05783	-0.02626							82	0.038222	0.064355							82	0.028174	0.019651							82	-0.13953	-0.149						82	0.048076	0.042812
						83	-0.06189	-0.04616							83	0.031534	0.060934							83	0.015395	0.021475							83	-0.12752	-0.13131						83	0.034542	0.069118
						84	-0.06388	-0.04708							84	0.03654	0.062486							84	0.030034	0.006657							84	-0.14724	-0.13928						84	0.031361	0.052762
						85	-0.07267	-0.03104							85	0.02966	0.055245							85	0.009291	0.021432							85	-0.15164	-0.1495						85	0.043462	0.047856
						86	-0.06496	-0.05402							86	0.03067	0.063881							86	0.024167	-0.00676							86	-0.12142	-0.15732						86	0.031071	0.056646
						87	-0.06866	-0.06126							87	0.024086	0.049431							87	0.016084	0.020289							87	-0.13333	-0.1778						87	0.034106	0.05207
						88	-0.07889	-0.05902							88	0.029205	0.0405							88	0.013125	0.009368							88	-0.1662	-0.17829						88	0.027148	0.058982
						89	-0.08551	-0.07083							89	0.018736	0.044921							89	0.017606	-0.02063							89	-0.16874	-0.17955						89	0.027125	0.04494
						90	-0.08166	-0.06423							90	0.032865	0.042246							90	0.014888	-0.01335							90	-0.16802	-0.17415						90	0.035008	0.037518
						91	-0.08253	-0.04356							91	0.023409	0.048257							91	0.003679	-0.02146							91	-0.16207	-0.20019						91	0.030371	0.045597
						92	-0.08616	-0.06159							92	0.033697	0.034971							92	0.004697	-0.0372							92	-0.16321	-0.19649						92	0.029939	0.031618
						93	-0.09159	-0.06929							93	0.027667	0.033621							93	0.013303	-0.02596							93	-0.15835	-0.21074						93	0.023037	0.044002
						94	-0.09556	-0.06796							94	0.028566	0.039579							94	0.010183	-0.01495							94	-0.16639	-0.20708						94	0.025994	0.038909
						95	-0.10577	-0.05889							95	0.019468	0.03294							95	0.007154	-0.0212							95	-0.18222	-0.21354						95	0.024704	0.038768
						96	-0.10497	-0.06745							96	0.025785	0.033008							96	-0.00321	-0.02719							96	-0.18129	-0.21822						96	0.02739	0.037648
						97	-0.11761	-0.06875							97	0.01444	0.034364							97	-0.00278	-0.03232							97	-0.17519	-0.22272						97	0.014122	0.036925
						98	-0.11461	-0.07619							98	0.021428	0.041545							98	-0.00222	-0.03756							98	-0.18496	-0.19775						98	0.021052	0.019022
						99	-0.11333	-0.07516							99	0.012944	0.016185							99	-0.00535	-0.05608							99	-0.18976	-0.22031						99	0.023624	0.014339
						100	-0.11659	-0.08368							100	0.011604	0.033347							100	-0.00049	-0.0568							100	-0.19906	-0.21936						100	0.018836	0.035616
						101	-0.12751	-0.07394							101	0.018233	0.024203							101	-0.00781	-0.06091							101	-0.19006	-0.20285						101	0.031716	0.018731
						102	-0.12985	-0.08434							102	0.010076	0.032658							102	-0.01122	-0.07252							102	-0.21102	-0.25574						102	0.016151	0.030109
						103	-0.13422	-0.08292							103	5.42e-07	0.019686							103	-0.00504	-0.05434							103	-0.21194	-0.22379						103	0.012053	0.024413
						104	-0.13652	-0.09784							104	0.004249	0.013531							104	-0.00362	-0.04596							104	-0.20709	-0.2248						104	0.014392	0.037005
						105	-0.14845	-0.09021							105	0.014071	0.014798							105	-0.01371	-0.04593							105	-0.21878	-0.25333						105	0.013031	0.030425
						106	-0.14438	-0.09159							106	0.007225	0.015303							106	-0.01138	-0.06864							106	-0.21032	-0.23899						106	0.011637	0.033526
						107	-0.15264	-0.09157							107	0.01027	0.017111							107	-0.01052	-0.07789							107	-0.22518	-0.25101						107	0.015562	0.030271
						108	-0.12988	-0.09627							108	0.006624	0.00421							108	-0.0133	-0.04923							108	-0.21831	-0.2599						108	0.009066	0.011867
						109	-0.13317	-0.08991							109	0.013277	0.007402							109	-0.01256	-0.05857							109	-0.21455	-0.27776						109	0.011352	0.019618
						110	-0.1531	-0.08867							110	-0.00046	0.011243							110	-0.01619	-0.05417							110	-0.23096	-0.25341						110	0.00765	0.023753
						111	-0.14846	-0.10521							111	0.006654	0.01572							111	-0.01123	-0.06552							111	-0.24141	-0.25824						111	0.012084	0.026447
						112	-0.14307	-0.10833							112	0.012798	-0.00291							112	-0.01659	-0.08738							112	-0.24115	-0.26976						112	0.004154	0.026338
						113	-0.16012	-0.11419							113	-0.0055	0.01725							113	-0.03412	-0.10894							113	-0.25903	-0.2634						113	0.005798	0.012086
						114	-0.16605	-0.09184							114	-0.00291	0.011545							114	-0.00797	-0.10248							114	-0.22975	-0.29915						114	0.008386	0.009373
						115	-0.16086	-0.1054							115	-0.00204	0.004066							115	-0.01332	-0.05955							115	-0.24689	-0.26899						115	0.002789	0.01217
						116	-0.17462	-0.12426							116	-0.0054	0.009296							116	-0.0191	-0.09895							116	-0.23369	-0.28251						116	0.008585	0.00097
						117	-0.17967	-0.1203							117	0.002373	-0.00222							117	-0.02275	-0.10057							117	-0.24657	-0.31239						117	-0.00528	0.004612
						118	-0.18947	-0.11924							118	-0.01099	0.001251							118	-0.01981	-0.0723							118	-0.22966	-0.29011						118	-0.00854	0.007774
						119	-0.1762	-0.11601							119	-0.00675	0.000602							119	-0.02478	-0.09363							119	-0.2526	-0.30627						119	-0.01092	0.018309
						120	-0.1777	-0.13115							120	-0.01485	0.016591							120	-0.01756	-0.10646							120	-0.24728	-0.29761						120	-0.005	0.008036
						121	-0.17746	-0.11845							121	-0.00179	0.006188							121	-0.02708	-0.05179							121	-0.26526	-0.31558						121	-0.00358	-0.00694
						122	-0.18916	-0.13209							122	-0.01207	-0.00051							122	-0.02154	-0.13036							122	-0.25735	-0.3168						122	-0.01042	-0.00061
						123	-0.18965	-0.13571							123	-0.01818	0.002744							123	-0.03436	-0.08863							123	-0.27606	-0.2975						123	-0.00529	-0.01044
						124	-0.18474	-0.13614							124	-0.01367	0.005039							124	-0.02508	-0.10245							124	-0.25681	-0.33867						124	-0.01014	-0.01233
						125	-0.1924	-0.15602							125	-0.02067	-0.00262							125	-0.0347	-0.09933							125	-0.26749	-0.32659						125	-0.0097	-0.02775
						n=	19	13							n=	14	17							n=	7	7							n=	13	14						n=	8	8
[truncated: 10 more columns]
