# Supplementary material for: Clathrin-independent endocytic retrieval of SV proteins mediated by the clathrin adaptor AP-2 at mammalian central synapses
Source: eLife. 2022 Jan 11;11:e71198. doi: 10.7554/eLife.71198 (PMC8752090; doi:10.7554/eLife.71198)
Supplement: Figure 3—figure supplement 1—source data 1. [file elife-71198-fig3-figsupp1-data1.xlsx]

## Sheet: Sheet1
				Figure 3-figure supplement 1B							Figure 3-figure supplement 1D						Figure 3-figure supplement 1E						Figure 3-figure supplement 1E
											VGLUT1 Retrieval fraction
				WT	AP-2 KO						WT	AP-2 KO					1	1.06395					1	1.10462
				1	0.200145						49.358	15.0387					3	0.876518					3	1.02237
											40.7973	7.16963					5	0.980511					5	0.974785
				1	0.26596						34.0801	30.3551					7	0.998424					7	0.961555
											50.4392	12.4691					9	1.0806					9	0.936669
				1	0.202678						47.0595	39.2968					11	1.07839					11	0.937514
											44.4072	9.43893					13	1.10167					13	0.946373
											47.3897	1.46793					15	1.08337					15	0.930871
				One sample t test							47.2395	3.72669					17	1.0784					17	1.03793
											37.0902	15.5786					19	1.22835					19	1.03635
				P value (two tailed)		0.0008					29.8225	14.0885					21	0.800815					21	0.716272
											33.137	15.1068					23	0.539337					23	0.394949
				N=3 independent experiments							47.9761	13.7205					25	0.415444					25	0.244631
											57.5163	2.7491					27	0.293465					27	0.205834
											61.0169	5.10042					29	0.222386					29	0.161488
											34.3905	11.4959					31	0.38541					31	0.122055
											42.1623	16.8275					33	0.326502					33	0.10653
											35.8656	2.53242					35	0.333243					35	0.0773359
											64.0286	22.1563					37	0.378063					37	0.0447713
											80.4496	12.9159					39	0.877196					39	0.821555
											60.1153	0.227529					41	1.05459					41	0.829428
											46.212	36.6918					43	1.09024					43	0.850609
											55.4522	28.1427					45	1.118					45	0.916219
											70.6121	13.4707					47	0.97327					47	0.955156
											70.6993	16.3549					49	1.07153					49	0.964026
											41.0789	19.3308					51	0.980404					51	0.993844
											34.2409						53	1.19604					53	1.08692
											41.1462						55	1.17492					55	1.11307
											51.2877						57	1.22672					57	1.16447
																	59	1.26592					59	1.17342
																	61	1.24942					61	1.21037
										n =	28	25					63	1.45001					63	1.35317
										N=6 independent experiments							65	4.03503					65	1.9008
																	67	5.86922					67	2.55999
																	69	6.41496					69	2.64179
											Unpaired t test						71	6.26427					71	2.56251
											P value (two tailed)	<0,0001					73	6.21667					73	2.50093
																	75	6.19241					75	2.50477
																	77	5.90849					77	2.46767
																	79	6.2091					79	2.46272
																	81	6.17972					81	2.51486
																	83	6.38635					83	2.5096
																	85	6.45346					85	2.51586
																	87	6.39411					87	2.49923
																	89	6.34013					89	2.54268
																	91	6.41936					91	2.61903
																	93	6.55202					93	2.60498
																	95	6.49384					95	2.58189
																	97	6.20455					97	2.05899
																	99	5.88129					99	1.22236
																	101	5.08432					101	0.578882
																	103	4.09293					103	0.482506
																	105	3.65699					105	0.411126
																	107	3.6474					107	0.490264
																	109	3.81676					109	1.16341
																	111	4.77003					111	1.81447
																	113	6.25804					113	1.90365
																	115	6.17171					115	2.26977
																	117	6.70525					117	2.26653
																	119	6.42061					119	2.37552
																	121	6.77975					121	2.44824
																	123	6.85098					123	2.46705
																	125	6.50069					125	2.55074
																	127	6.76866					127	2.56669
																	129	6.9067					129	2.64242
																	131	7.00538					131	2.66281
																	133	6.9296					133	2.65205
																	135	7.00177					135	2.64475
																	137	7.09965					137	2.69003
																	139	7.21563					139	2.71721
																	141	7.29597					141	2.70435
																	143	7.2844					143	2.70829
																	145	7.31671					145	2.74536
																	147	7.26803					147	2.77266
