# Supplementary material for: Clathrin-independent endocytic retrieval of SV proteins mediated by the clathrin adaptor AP-2 at mammalian central synapses
Source: eLife. 2022 Jan 11;11:e71198. doi: 10.7554/eLife.71198 (PMC8752090; doi:10.7554/eLife.71198)
Supplement: Figure 3—source data 1. [file elife-71198-fig3-data1.xlsx]

## Sheet: Sheet1
		Figure 3A						Figure 3B					Figure 3C						Figure 3D						Figure 3E					Figure 3F						Figure 3G					Figure 3H					Figure 3I
		Syt1 pHluorin Trace						Syt1 Tau					SV2 pHluorin Trace						SV2 Tau						VGLUT1 pHluorin Trace					VGLUT1 Tau						VGAT pHluorin Trace					VGAT Tau					Syp pHluorin Trace
			WT + RFP	AP-2 KO + RFP	AP-2 KO + muRFP			WT + RFP	AP-2 KO + RFP	AP-2 KO + muRFP				WT + RFP	AP-2 KO + RFP	AP-2 KO + muRFP			WT + RFP	AP-2 KO + RFP	AP-2 KO + muRFP				WT + RFP	AP-2 KO + RFP	AP-2 KO + muRFP			WT + RFP	AP-2 KO + RFP	AP-2 KO + muRFP				WT + RFP	AP-2 KO + RFP	AP-2 KO + muRFP			WT + RFP	AP-2 KO + RFP	AP-2 KO + muRFP				WT + RFP	AP-2 KO + RFP	AP-2 KO + muRFP
		0	0.016427	0.072587	0.040003			17.09	10.47	16.58			0	0.026715	0.064877	0.027024			8.077	13.95	10.03			0	0.012519	0.048137	0.029026			6.326	17.95	17			0	0.029236	0.055754	0.04541			28.31	15.61	30.27			0	0.021602	0.006552	0.006696
		2	0.045333	0.019248	-0.01068			18.42	35.15	29.69			2	0.00753	0.007742	0.002781			19.33	13.22	19.23			2	0.008634	0.014478	0.005622			7.482	39.83	14.39			2	0.00744	0.013295	0.018927			19.56	30.48	25.67			2	-0.00234	-0.0055	-0.00051
		4	-0.04032	0.005109	0.002573			19.46	16.11	26.47			4	-0.00755	-0.00942	0.000733			19.94	14.27	15.88			4	0.00594	-0.01485	-0.00635			15.3	18.9	7.63			4	0.000803	-0.00681	-0.01069			20.53	45.84	30.71			4	-0.01476	-0.00303	-0.00671
		6	-0.02001	-0.0116	-0.0097			18.66	26.65	13.3			6	-0.01124	-0.04474	-0.01805			17.03	20.31	12.08			6	-0.01841	-0.03046	-0.01267			21.52	25.42	20.21			6	-0.02413	0.004858	-0.02245			17.36	14.86	27.77			6	-0.00062	9.95e-05	-0.00223
		8	-0.0166	0.086255	-0.0222			21.72	16.43				8	-0.01184	-0.00238	-0.00138			15.28	29.01	27.49			8	-0.0129	0.017139	-0.01563			6.763	27.67	12.43			8	0.012445	0.135367	-0.02405			23.25	78.94	28.1			8	-0.01135	0.009776	0.011901
		10	0.267247	0.399674	0.453951			11.62	30.04				10	0.36509	0.40414	0.376651			22.52	21.11	10.65			10	0.317419	0.433425	0.357176			12.03	30.82	16.15			10	0.378872	0.388788	0.391455			16.04	11.05	14.55			10	0.360471	0.34924	0.368499
		12	0.66843	0.749835	0.820991			13.21	15.84				12	0.762332	0.790568	0.768956			24.09	17.34	10.65			12	0.758512	0.805925	0.751443			6.844	30.21	12.14			12	0.776096	0.749873	0.788954			17.35	11.05	12.23			12	0.788526	0.750681	0.765925
		14	1	1	1								14	1	1	1			35.37	18.28	14.68			14	1	1	1			6.741	14.43	12.07			14	1	1	1			13.52	97.47	41.71			14	1	1	1
		16	0.929303	0.87181	0.879301								16	0.894849	0.901113	0.888507			26.62	8.003	12.11			16	0.851803	0.904698	0.873181			11.86	30.75	16.68			16	0.891928	0.904921	0.892419			10.97	25.79	49.09			16	0.847258	0.908542	0.860925
		18	0.815266	0.785207	0.768072								18	0.798902	0.817494	0.791443			32.2	28.07	23.48			18	0.715816	0.83078	0.776305			10.52	30.86	19.99			18	0.782541	0.884531	0.806536			19.65	75.86	46.8			18	0.700655	0.807169	0.729678
		20	0.739216	0.683735	0.660337								20	0.708731	0.738447	0.694719			18.73	16.52	20.57			20	0.59565	0.755441	0.680963			12.55	40.97	13.56			20	0.695795	0.808859	0.730746			23.45	39.21	45.15			20	0.582225	0.722961	0.619938
		22	0.661144	0.639379	0.621222								22	0.62878	0.662806	0.61639			27.62	37.98	16.01			22	0.497045	0.698164	0.591329			12.57	25.03	15			22	0.618825	0.768732	0.652143			10.4		27.7			22	0.495707	0.647206	0.530808
		24	0.544584	0.57317	0.560281								24	0.568291	0.614294	0.546141			27.14	14.29	9.051			24	0.415806	0.65036	0.515173			10.71	22.64	17.75			24	0.54496	0.714051	0.593302			12.85		39.23			24	0.415923	0.592682	0.462414
		26	0.51578	0.556837	0.529621								26	0.494426	0.534199	0.483623			19.19	14.07	30.37			26	0.353729	0.61383	0.453242			10.74	25.22	14.51			26	0.476914	0.663039	0.527839			22.31		17.11			26	0.351409	0.537536	0.389667
		28	0.481582	0.53394	0.490148				Tukey's multiple comparisons test	Adjusted P Value			28	0.441222	0.502159	0.433818			15.59	19.54	40.99			28	0.294835	0.575512	0.38614			11.78	38.95	15.09			28	0.420918	0.661725	0.475719			17.36		13.01			28	0.300009	0.479006	0.344032
		30	0.414189	0.438841	0.450895				WT + RFP vs. AP-2 KO + RFP	0.4994			30	0.401417	0.450133	0.377905			15.15	18.81	16.62			30	0.263159	0.537608	0.332206			9.804	45.73	14.85			30	0.362775	0.611214	0.420651			10.39		13.33			30	0.246928	0.443524	0.288596
		32	0.344308	0.414012	0.4149				WT + RFP vs. AP-2 KO + muRFP	0.6018			32	0.35086	0.391168	0.329519			14.18	16.94	12.63			32	0.217387	0.493419	0.286779			12.29	20.76	8.479			32	0.318263	0.60472	0.377401			18.04		10.71			32	0.21637	0.406305	0.243104
		34	0.372669	0.34796	0.379747				AP-2 KO + RFP vs. AP-2 KO + muRFP	>0,9999			34	0.307103	0.372613	0.29734			11.83	32.66	21.86			34	0.190665	0.473036	0.251781			14.54	34.07	13.43			34	0.267107	0.564312	0.334927			14.14		10.93			34	0.18186	0.37778	0.203902
		36	0.28448	0.301816	0.363828								36	0.268899	0.308447	0.264409			17.13	28.78	13.39			36	0.161326	0.451723	0.219059			16.52	26.96	23.61			36	0.251665	0.555259	0.29696			15.75		8.664			36	0.156123	0.344911	0.171005
		38	0.229543	0.284887	0.319202								38	0.231936	0.293374	0.225537			15.92	18.5	7.419			38	0.140966	0.411999	0.184119			13.11	47.93	18.41			38	0.217961	0.541393	0.258595			25.83		8.522			38	0.136651	0.31466	0.139017
		40	0.227026	0.251977	0.300283								40	0.211281	0.253231	0.211916			15.46	15.37	8.085			40	0.109294	0.384414	0.153592			19.34	30.46	22.97			40	0.181057	0.523392	0.230621			20.52		11.49			40	0.114023	0.283806	0.107712
		42	0.185442	0.235956	0.280176								42	0.18467	0.246451	0.166046			14.09	21.38	15.53			42	0.109249	0.358636	0.127775			5.874	15				42	0.153572	0.525119	0.208957			12.59		30.77			42	0.095042	0.262761	0.09277
		44	0.156314	0.201638	0.265678		n=	7	7	4			44	0.158325	0.209713	0.152218			16.13	31.92	21.84			44	0.088565	0.336067	0.111003			5.608	40.47				44	0.141908	0.513698	0.173867			18.21		13.56			44	0.081391	0.238328	0.072738
		46	0.134803	0.209716	0.25071								46	0.141565	0.179922	0.124098			13.09		19.8			46	0.064334	0.329537	0.088168			8.373	46.82				46	0.115129	0.538247	0.155316			21.44		15			46	0.069395	0.225109	0.052894
		48	0.140184	0.184646	0.225479			N=2 independent experiments					48	0.123712	0.161425	0.115397			8.33		21.8			48	0.053189	0.305518	0.074332			21.38					48	0.09584	0.481434	0.137828			11.99		17.75			48	0.052598	0.206375	0.030471
		50	0.110542	0.159392	0.224076								50	0.096248	0.11175	0.096132			15.21		15.45			50	0.04651	0.289704	0.059397			21.21					50	0.080482	0.450485	0.121344			13.56		18.47			50	0.046174	0.193106	0.014221
		52	0.104508	0.115103	0.172067								52	0.082997	0.094643	0.078581			18.75		21.11			52	0.040209	0.280191	0.047735			20.04					52	0.063367	0.437451	0.103548			22.68		21.89			52	0.035969	0.186275	0.002242
		54	0.084691	0.119427	0.16575								54	0.067823	0.108538	0.072208			16.05		15.23			54	0.018963	0.264594	0.035544			7.584					54	0.04278	0.424859	0.081629			12.78		14.76			54	0.034059	0.166487	-0.0085
		56	0.082088	0.119845	0.163936								56	0.057117	0.068399	0.03962			21.79		23.06			56	0.030188	0.241423	0.028086			12.49					56	0.027597	0.39655	0.066621			11.2		21.04			56	0.020533	0.160278	-0.02399
		58	0.059214	0.082484	0.164641								58	0.044804	0.064142	0.049666			16.48		17.98			58	0.0251	0.225935	0.022732			23.29					58	0.008223	0.402696	0.065516			20.4		9.375			58	0.011519	0.141203	-0.03187
		60	0.024602	0.077157	0.136735								60	0.031517	0.04916	0.028546			13.44		18.96			60	0.007963	0.213184	0.012214			21.29					60	-0.01188	0.366001	0.04732			7.741		9.988			60	-0.00021	0.129406	-0.03851
		62	0.010167	0.051442	0.126972								62	0.02427	0.023027	0.018141			9.483		17.72			62	0.013053	0.203298	0.007564			21.16					62	-0.00102	0.348235	0.038885			16.62		11.43			62	0.002987	0.122201	-0.05454
		64	-0.02669	0.03914	0.107523								64	0.013244	0.008537	0.010659			25.02		28.7			64	-0.00027	0.189111	-0.00352			15.51					64	-0.00731	0.327283	0.030884			14.09					64	-0.00609	0.106874	-0.04367
		66	0.025904	0.015548	0.124349								66	0.008692	0.027613	0.003066			33.71		9.7			66	-0.00214	0.168933	-0.00588			16.5					66	-0.01638	0.313894	0.02811			8.995					66	-0.00783	0.107522	-0.05614
		68	-0.00361	0.012115	0.079743								68	0.00232	0.010424	-0.00143			17.06		26.11			68	-0.00638	0.161507	-0.01423			19.33					68	-0.02297	0.32595	0.013014								68	-0.01421	0.105585	-0.04227
		70	0.025326	0.015792	0.078748								70	-0.0053	0.014028	0.001596			8.826		17.2			70	-0.01084	0.158076	-0.01886			22.68					70	-0.03266	0.350449	0.000398								70	-0.02187	0.101971	-0.05342
		72	-0.02246	0.013578	0.091048								72	-0.01837	0.001728	-0.01121			16.1		23.84			72	-0.00145	0.15146	-0.02626			12.78					72	-0.03373	0.32129	-0.00498								72	-0.02147	0.091772	-0.05866
		74	-0.0386	-0.02837	0.071983								74	-0.02016	-0.02951	-0.0266			23.9					74	-0.01345	0.138486	-0.01704			11.2					74	-0.04904	0.288534	-0.01202								74	-0.02837	0.101759	-0.05314
		76	-0.01227	-0.03215	0.056128								76	-0.02017	-0.02492	-0.03256			14.58					76	-0.01103	0.125187	-0.03259			20.4					76	-0.05012	0.314963	-0.02421								76	-0.0323	0.080049	-0.06245
		78	-0.04885	-0.03304	0.066659								78	-0.03162	-0.03184	-0.03225			15.22					78	-0.01165	0.120755	-0.03695			10.46					78	-0.05644	0.300779	-0.02579								78	-0.03639	0.080347	-0.06522
		80	-0.0831	-0.05171	0.047938								80	-0.03077	-0.05341	-0.03469			12.44					80	-0.01604	0.114823	-0.04436			10.62					80	-0.04742	0.300483	-0.0248								80	-0.04969	0.076076	-0.06617
		82	-0.05097	-0.05525	0.050056								82	-0.03793	-0.03898	-0.04127			18.06					82	-0.02752	0.106341	-0.05859			11.85					82	-0.06241	0.30681	-0.03487								82	-0.05388	0.063166	-0.07268
		84	-0.05923	-0.04891	0.041785								84	-0.04047	-0.0428	-0.04147			27.72					84	-0.03351	0.094695	-0.05005			11.88					84	-0.06637	0.291742	-0.03973		n=	34	14	32			84	-0.05074	0.057883	-0.07646
		86	-0.0932	-0.06039	0.045192								86	-0.043	-0.0566	-0.03984			12.84					86	-0.02621	0.084364	-0.05481			19.55					86	-0.06442	0.232603	-0.05238								86	-0.05495	0.057113	-0.07876
		88	-0.08081	-0.09651	0.02935								88	-0.05202	-0.07392	-0.04209								88	-0.02301	0.080215	-0.05322			20					88	-0.08158	0.220024	-0.05565			N=7 independent experiments					88	-0.06222	0.035887	-0.08892
		90	-0.07245	-0.09344	0.044819								90	-0.04226	-0.00835	-0.05413								90	-0.03602	0.075717	-0.06106								90	-0.07737	0.206328	-0.05563
		92	-0.07606	-0.10049	0.00902								92	-0.04679	-0.01511	-0.06246								92	-0.02494	0.060745	-0.06444								92	-0.07777	0.222433	-0.06428			Tukey's multiple comparisons test			Adjusted P Value
		94	-0.09117	-0.10114	0.023612								94	-0.04712	-0.01257	-0.0611								94	-0.02564	0.064266	-0.0688								94	-0.07005	0.206141	-0.06557			WT + RFP vs. AP-2 KO + RFP			<0,0001		n=	27	29	37
		96	-0.09671	-0.09527	0.011169								96	-0.05354	-0.01333	-0.07069								96	-0.04922	0.048539	-0.06741								96	-0.08154	0.200223	-0.07583			WT + RFP vs. AP-2 KO + muRFP			0.3252			N=6 independent experiments
		98	-0.1223	-0.12573	0.000254								98	-0.05183	-0.02474	-0.06503								98	-0.03568	0.047038	-0.06676								98	-0.08727	0.173337	-0.07456			AP-2 KO + RFP vs. AP-2 KO + muRFP			0.0008
		100	-0.17007										100	-0.05462	-0.08012	-0.07017								100	-0.04161	0.038305	-0.07752								100	-0.0834	0.149777	-0.08857
																								102	-0.0445	0.03408	-0.07885								102	-0.08324	0.146826	-0.08542
																		n=	44	23	37			104	-0.03311	0.025116	-0.07964								104	-0.09539	0.136452	-0.0958
		n=	7	7	4								n=	44	23	37								106	-0.04417	0.027666	-0.08104								106	-0.09411	0.126049	-0.08905
		N=2 independent experiments											N=5 independent experiments						N=5 independent experiments					108	-0.03974	0.01119	-0.08123								108	-0.11115	0.114857	-0.10051
																								110	-0.03788	0.021978	-0.08218								110	-0.09766	0.087896	-0.09639
																								112	-0.05587	0.007316	-0.09274								112	-0.1017	0.045495	-0.10594
																								114	-0.05671	-0.00395	-0.0905								114	-0.09829	0.019387	-0.10376
																			Tukey's multiple comparisons test	Adjusted P Value				116	-0.04195	-0.00876	-0.09392								116	-0.10776	-0.03269	-0.11001
																			WT + RFP vs. AP-2 KO + RFP	0.4665				118	-0.07255	-0.00639	-0.10248								118	-0.10881	-0.02149	-0.10462
																			WT + RFP vs. AP-2 KO + muRFP	0.9797
																			AP-2 KO + RFP vs. AP-2 KO + muRFP	0.3943															n=	34	14	32
																								n=	37	24	21			Tukey's multiple comparisons test	Adjusted P Value				N=7 independent experiments
																								N=6 independent experiments						WT + RFP vs. AP-2 KO + RFP	<0,0001
																														WT + RFP vs. AP-2 KO + muRFP	0.5762
																														AP-2 KO + RFP vs. AP-2 KO + muRFP	<0,0001
																													n=	37	24	21
																														N=6 independent experiments
