# Supplementary material for: Clathrin-independent endocytic retrieval of SV proteins mediated by the clathrin adaptor AP-2 at mammalian central synapses
Source: eLife. 2022 Jan 11;11:e71198. doi: 10.7554/eLife.71198 (PMC8752090; doi:10.7554/eLife.71198)
Supplement: Figure 4—figure supplement 1—source data 1. [file elife-71198-fig4-figsupp1-data1.xlsx]

## Sheet: Sheet1
					Figure 4-figure supplement 1B
											Active synapses 10 AP					Active synapses 20 AP					Active synapses 50 AP
						WT	AP-2 KO				WT	AP-2 KO				WT	AP-2 KO				WT	AP-2 KO
					10	0.230769	0.023256				0	0				1	1				1	1
					20	0.730769	0.511628				0	0				0	0				1	1
					50	0.923077	0.860465				0	0				1	0				1	1
					75	0.980769	0.953488				0	0				1	0				1	1
					100	1	1				0					1					1
											0	0				1	0				1	0
											0	0				0	0				1	0
											0	0				1	0				1	0
											1	0				1	1				1	1
											0	0				0	0				1	1
											1	0				1	0				1	1
											1	0				1	0				1	0
											0	0				1	0				1	1
											0					1					1
											0	0				1	0				1	1
											1	0				1	1				1	1
											1	0				1	0				1	1
											0					1					1
												0					1					1
											0	0				0	1				1	1
											0	0				1	1				1	1
											1	0				1	0				1	1
											1	0				1	1				1	1
												0					1					1
												0					1					1
											0	0				1	1				1	1
												0					1					1
												0					1					1
												0					1					1
											0	0				1	0				1	1
												0					0					0
											1	0				1	0				1	1
											1	0				1	1				1	1
											0	0				1	1				1	1
											0	0				1	0				1	1
											1	0				1	0				1	0
												0					1					1
											0	0				0	1				0	1
											0	1				1	1				1	1
												0					1					1
											0	0				1	1				1	1
											0	0				1	1				1	1
											0	0				0	1				0	1
												0					0					1
											0	0				1	0				1	1
											1	0				1	0				1	1
											1					1					1
											0					0					1
											0					0					0
											0					1					1
											0					1					1
											0					1					1
											0					0					0
											0					0					1
											0					0					1
											0					0					1
											0					0					1
											0					0					1
											0					1					1
											0					1					1
											0					1					1
											0					1					1
											Unpaired t test					Unpaired t test					Unpaired t test
											P value	0.0031				P value	0.0276				P value	0.3275
										n=	52	43			n=	52	43			n=	52	43
