# Supplementary material for: Clathrin-independent endocytic retrieval of SV proteins mediated by the clathrin adaptor AP-2 at mammalian central synapses
Source: eLife. 2022 Jan 11;11:e71198. doi: 10.7554/eLife.71198 (PMC8752090; doi:10.7554/eLife.71198)
Supplement: Figure 4—source data 1. [file elife-71198-fig4-data1.xlsx]

## Sheet: Sheet1
			Figure 4A				Figure 4B					Figure 4C				Figure 4D					Figure 4E				Figure 4F					Figure 4G				Figure 4H
			SV2 pHluorin Trace				SV2 Tau					VGLUT1 pHluorin Trace				VGLUT1 Tau					SV2 pHluorin Trace				SV2 Tau					VGLUT1 pHluorin Trace				VGLUT1 Tau
			shCTRL	shCHC			shCTRL	shCHC				shCTRL	shCHC			shCTRL	shCHC				WT	AP-2 KO			WT	AP-2 KO				WT	AP-2 KO			WT	AP-2 KO
		1	0.084871	0.046845			46.8038	25.099			1	0.058147	0.011336			10.5692	22.9948			0	0.054056	0.034294			11.28	16.56			0	-0.00500498	0.007486			14.05	19.24
		2	0.055505	0.0256			11.1263	20.0161			2	-0.00393	-0.00563			14.5964	12.2865			1	0.016467	-0.00254			6.646	10.23			1	-0.00173761	-0.00316			9.169	16.09
		3	0.024725	0.006728			22.6819	12.1333			3	0.007763	-0.01627			9.81283	23.488			2	-0.0149	0.000314			10.26	5.424			2	-0.0318652	-0.00102			16.72	27.22
		4	0.011244	-0.0054			19.1447	11.5223			4	-0.00026	-0.02772			18.8744	17.3251			3	-0.05224	-0.03457			17.5	16.81			3	0.0172771	-0.00572			10.92	37.5
		5	-0.00168	-0.02201			28.1285	28.4017			5	0.002359	-0.04591			15.1024	11.652			4	-0.02243	-0.03735			17.02	19.53			4	-0.0326135	-0.00791			10.2	20.38
		6	0.014926	-0.00925			9.01688	13.847			6	-0.01296	-0.02881			9.16918	8.39837			5	-0.0523	-0.03551			10.64	15.52			5	0.00437891	0.004831			14.82	18
		7	0.01073	-0.02578			35.6101	15.2878			7	-0.02719	-0.03825			30.3402	10.9972			6	-0.03821	-0.05765			17.8	19.23			6	0.0418573	0.048308			14.49	30.61
		8	0.013436	-0.04025			13.7746	35.2018			8	-0.04166	-0.04645			9.31903	6.87748			7	0.00979	0.05436			9.123	14.69			7	0.0777973	0.066302			12.17	17.74
		9	0.016127	-0.03491			17.586	26.4905			9	-0.0324	-0.03238			11.0543	14.7513			8	0.061717	0.004652			16.69	8.456			8	0.163684	0.127445			8.154	26.86
		10	0	0			18.6112	31.4573			10	0	0			10.6618	9.75126			9	0.229012	0.139487			8.23	16.2			9	0.332523	0.212008			9.47	20.9
		11	0.24183	0.203321			8.5924	8.96419			11	0.234914	0.250567			5.45777	32.1024			10	0.571032	0.520628			11.25	17.54			10	0.579208	0.495451			9.874	16.81
		12	0.45139	0.446216			8.54307	14.1672			12	0.473244	0.470289			9.60557	11.5811			11	0.789871	0.830258			14.07	10.01			11	0.805216	0.763801			11.71	35.09
		13	0.635806	0.654176			27.0128	15.6237			13	0.664281	0.686197			11.5044	6.65251			12	1	1			10.69	18.52			12	1	1			11.5	14.76
		14	0.825639	0.856635			27.0128	16.1189			14	0.877092	0.86754			9.09759	8.7801			13	0.893538	0.888946				7.508			13	0.885405	0.871888			13.42	54.87
		15	0.994967	1				5.99499			15	0.994986	0.994971				7.50058			14	0.893307	0.825401				8.566			14	0.828784	0.833453			19.12	34.59
		16	1	0.99419				11.7516			16	1	1							15	0.801484	0.759514				13.52			15	0.803601	0.785259			6.949	24.51
		17	0.985927	0.999792				34.0632			17	0.993892	0.967731							16	0.715651	0.713226				11.95			16	0.715297	0.752967			7.921	19.89
		18	0.973773	0.953576							18	0.934204	0.952368							17	0.661146	0.679517				8.666			17	0.677242	0.719803			9.8	20.41
		19	0.956747	0.917946							19	0.883519	0.89101							18	0.575442	0.58765				9.12			18	0.626375	0.688297			11.22	20.78
		20	0.889849	0.857912			Unpaired t test				20	0.847858	0.834323			Unpaired t test				19	0.548441	0.544544				11.21			19	0.574813	0.648259			10.81	15.87
		21	0.876843	0.812412			P value	0.6274			21	0.807234	0.794075			P value	0.6468			20	0.490252	0.492324				7.228			20	0.512213	0.58423			11.37	23.47
		22	0.848463	0.774023							22	0.741182	0.727245							21	0.445561	0.454895				19.64			21	0.457339	0.566711				17.95
		23	0.815273	0.733014							23	0.690666	0.682413							22	0.417807	0.413868				20.61			22	0.417202	0.568914				23.47
		24	0.756558	0.659848		n=	14	17			24	0.635788	0.631883		n=	14	15			23	0.341998	0.404359				13.44			23	0.372206	0.505294				17.95
		25	0.730662	0.641962							25	0.581545	0.585157							24	0.318044	0.350291							24	0.335409	0.501613
		26	0.703381	0.596983							26	0.58509	0.548767							25	0.282503	0.348958							25	0.293348	0.479596
		27	0.638046	0.574385							27	0.524124	0.508827							26	0.245766	0.31281							26	0.275917	0.45626
		28	0.607396	0.502102							28	0.486884	0.476235							27	0.228287	0.281482			Unpaired t test				27	0.216923	0.467033
		29	0.584978	0.483714							29	0.460844	0.428923							28	0.224126	0.274427			P value	0.5355			28	0.225519	0.403967
		30	0.531456	0.454558							30	0.429702	0.399656							29	0.155418	0.256761							29	0.210001	0.441335
		31	0.494624	0.433507							31	0.40127	0.360001							30	0.207596	0.268144			N=4 independent experiments				30	0.207683	0.373724			Unpaired t test
		32	0.502314	0.404993							32	0.36135	0.321718							31	0.183985	0.225197							31	0.154522	0.367823			P value	<0,0001
		33	0.459637	0.384407							33	0.31538	0.307041							32	0.221799	0.203824							32	0.169153	0.405571
		34	0.430517	0.35416							34	0.284106	0.29081							33	0.124777	0.204912							33	0.146569	0.366767			N=5 independent experiments
		35	0.405048	0.319313							35	0.249507	0.268159							34	0.113418	0.170115							34	0.125528	0.369652
		36	0.363072	0.320365							36	0.211841	0.238569							35	0.137346	0.161528							35	0.131316	0.358012
		37	0.379691	0.307707							37	0.186404	0.201741							36	0.133808	0.165895							36	0.0894083	0.314436
		38	0.333208	0.304336							38	0.150617	0.195584							37	0.124162	0.14679							37	0.129768	0.311694
		39	0.321103	0.268238							39	0.140911	0.17688							38	0.146084	0.16074							38	0.0893855	0.340687
		40	0.281604	0.255838							40	0.112467	0.139689							39	0.050603	0.149335							39	0.086614	0.333029
		41	0.261328	0.226973							41	0.095768	0.117885							40	0.058573	0.127763							40	0.0704472	0.304491
		42	0.260331	0.216331							42	0.07161	0.094566							41	0.070239	0.122513							41	0.0664707	0.246348
		43	0.235185	0.220817							43	0.059176	0.088516							42	0.050196	0.101396							42	0.07227	0.259035
		44	0.230181	0.19077							44	0.029257	0.075443							43	0.050205	0.096702							43	0.0666262	0.251515
		45	0.217185	0.195989							45	0.023545	0.061206							44	0.041599	0.129552							44	0.0255142	0.256789
		46	0.15976	0.172889							46	0.018102	0.043889							45	0.069332	0.092145							45	0.0340292	0.27703
		47	0.175419	0.15434							47	0.006583	0.049984							46	0.04458	0.114232							46	0.0561681	0.228053
		48	0.172552	0.141317							48	-0.0263	0.014012							47	0.072014	0.095669							47	0.0208889	0.224252
		49	0.159531	0.161057							49	-0.03066	0.027194							48	0.040345	0.082229							48	0.0162647	0.214267
		50	0.124647	0.135954							50	-0.03276	0.006344							49	0.052556	0.083552							49	0.0214919	0.203158
		51	0.116776	0.120805							51	-0.04612	-0.00934							50	0.029268	0.090439							50	0.0213509	0.224174
		52	0.101244	0.118242							52	-0.05543	-0.02151							51	0.036025	0.101197							51	0.0416165	0.216967
		53	0.112885	0.123435							53	-0.06702	-0.02781							52	0.031638	0.063063							52	0.0409846	0.212594
		54	0.105988	0.086134							54	-0.06876	-0.01139							53	0.026502	0.066507							53	0.0335039	0.176868
		55	0.082661	0.099133							55	-0.08492	-0.03615							54	0.054732	0.05629							54	0.0174074	0.172987
		56	0.075585	0.094103							56	-0.07853	-0.03314							55	0.058998	0.073144							55	0.030505	0.156024
		57	0.070035	0.065985							57	-0.09584	-0.04801							56	0.047592	0.079372							56	0.0149495	0.190423
		58	0.056322	0.074917							58	-0.10743	-0.03675							57	0.043909	0.047554							57	0.025595	0.199391
		59	0.069204	0.06191							59	-0.11111	-0.05525							58	0.057704	0.059366							58	0.0510148	0.15641
		60	0.046981	0.050069							60	-0.12529	-0.06388							59	0.039104	0.020926							59	0.0109458	0.174821
		61	0.04721	0.066349							61	-0.10881	-0.05493							60	0.013154	0.039379							60	-0.0216798	0.139636
		62	0.025717	0.029524							62	-0.13831	-0.06511							61	0.020597	0.051859							61	0.0286663	0.144178
		63	0.040037	0.045283							63	-0.13083	-0.06769							62	0.066762	0.025681							62	-0.0154818	0.126031
		64	0.008421	0.029747							64	-0.13644	-0.07376							63	0.000692	0.025918							63	0.00872016	0.121929
		65	-0.00344	0.025999							65	-0.15191	-0.08683							64	0.013908	0.00284							64	0.0148174	0.152028
		66	-0.00952	0.015827							66	-0.14605	-0.09879							65	-0.00363	0.024721							65	0.00225036	0.137615
		67	0.006937	0.013966							67	-0.16611	-0.09251							66	0.010087	0.039995							66	0.0202129	0.0985128
		68	-0.02271	0.016172							68	-0.15666	-0.10413							67	0.026873	0.028967							67	-0.00224649	0.134211
		69	-0.01881	0.005703							69	-0.17267	-0.11504							68	0.002413	0.02471							68	0.0141807	0.0944544
		70	-0.01945	-0.01321							70	-0.17817	-0.11874							69	-0.00292	0.032695							69	-0.0115267	0.107421
		71	-0.01549	-0.01104							71	-0.20004	-0.11258							70	0.017765	0.019974							70	-0.00951075	0.111181
		72	-0.01336	0.006084							72	-0.20622	-0.11605							71	-0.00057	0.010968							71	0.00795535	0.111297
		73	-0.0394	-0.00881							73	-0.19332	-0.1321							72	0.023061	0.014573							72	-0.00814057	0.109311
		74	-0.04382	-0.01004							74	-0.19873	-0.13069							73	-0.00241	0.008525							73	-0.0135018	0.152962
		75	-0.04437	-0.02148							75	-0.20033	-0.14766							74	0.025369	0.010617							74	-0.0027186	0.108069
		76	-0.06816	-0.01969							76	-0.21702	-0.1345							75	0.040114	0.009767							75	-0.0374735	0.114973
		77	-0.04655	-0.02019							77	-0.21904	-0.14603							76	0.026692	0.016904							76	0.0143517	0.134525
		78	-0.05982	-0.02355							78	-0.22288	-0.15755							77	-0.01026	0.04592							77	-0.0011458	0.113638
		79	-0.06547	-0.02744							79	-0.21659	-0.1479							78	0.003662	0.030114							78	-0.0144297	0.118339
		80	-0.05697	-0.04266							80	-0.22376	-0.15656							79	-0.05724	0.044747							79	-0.000849993	0.119977
		81	-0.0705	-0.04219							81	-0.23372	-0.16579							80	-0.04237	0.06769							80	-0.021881	0.100283
		82	-0.07623	-0.03531							82	-0.22142	-0.17254							81	-0.01368	0.061901							81	-0.0113627	0.149904
		83	-0.07772	-0.03772							83	-0.22819	-0.18511							82	-0.00759	0.030157							82	-0.0249571	0.094228
		84	-0.08775	-0.06172							84	-0.24885	-0.18609							83	0.006914	0.063087							83	-0.0140372	0.0953237
		85	-0.06464	-0.03522							85	-0.23145	-0.18434							84	-0.04583	0.067238							84	-0.0338939	0.0473522
		86	-0.10749	-0.07154							86	-0.25348	-0.17849									0.04875								0.0164911	0.125432
		87	-0.10967	-0.06106							87	-0.23815	-0.19393									0.038036								-0.0395615	0.0628014
		88	-0.11211	-0.0607							88	-0.23482	-0.19113									0.030199								-0.0556203	0.119499
		89	-0.10207	-0.08363							89	-0.24599	-0.18882									0.03209								-0.0642941	0.104566
		90	-0.11069	-0.06126							90	-0.2483	-0.20744									0.025417								-0.0531637
		91	-0.1191	-0.07163							91	-0.24864	-0.2175									-0.25328
		92	-0.12073	-0.0767							92	-0.24848	-0.21594
		93	-0.10795	-0.09654							93	-0.2564	-0.20599
		94	-0.11705	-0.09434							94	-0.27714	-0.21026
		95	-0.13996	-0.08044							95	-0.25877	-0.2281
		96	-0.15109	-0.07246							96	-0.26782	-0.21234
		97	-0.14044	-0.08748							97	-0.26224	-0.21523																n=	21	22
		98	-0.13564	-0.10691							98	-0.28918	-0.23093							n=	13	24							N=5 independent experiments
		99	-0.13181	-0.09313							99	-0.26873	-0.22155							N=4 independent experiments
		100	-0.14656	-0.08265							100	-0.29036	-0.22723
		101	-0.13399	-0.08883							101	-0.27958	-0.23489
		102	-0.13896	-0.09649							102	-0.28871	-0.23468
		103	-0.12879	-0.11501							103	-0.28984	-0.23441
		104	-0.16901	-0.11246							104	-0.29295	-0.23514
		105	-0.15392	-0.11953							105	-0.28654	-0.23212
		106	-0.16248	-0.11599							106	-0.31507	-0.23957
		107	-0.15582	-0.11484							107	-0.30074	-0.23698
		108	-0.16647	-0.12469							108	-0.3197	-0.24005
		109	-0.16713	-0.11306							109	-0.30943	-0.24662
		110	-0.15513	-0.125							110	-0.30855	-0.25009
		111	-0.15874	-0.13714							111	-0.3103	-0.25686
		112	-0.17236	-0.11806							112	-0.32345	-0.25544
		113	-0.18606	-0.1243							113	-0.31088	-0.25715
		114	-0.16845	-0.1165							114	-0.31039	-0.26181
		115	-0.17257	-0.15511							115	-0.32899	-0.25718
		116	-0.16012	-0.14613							116	-0.32733	-0.2692
		117	-0.1734	-0.12846							117	-0.32677	-0.26736
		118	-0.17803	-0.12656							118	-0.32515	-0.26103
		119	-0.18204	-0.13682							119	-0.32734	-0.26324
		120	-0.18603	-0.14007							120	-0.32438	-0.27916
		121	-0.1804	-0.14101							121	-0.32249	-0.26792
		122	-0.17748	-0.15512							122	-0.31703	-0.257
		123	-0.18359	-0.14502							123	-0.32122	-0.27172
		124	-0.18439	-0.16194							124	-0.32977	-0.26139
		125	-0.18055	-0.17121							125	-0.33326	-0.27489
		n=	14	17							n=	14	15
