# Supplementary material for: Clathrin-independent endocytic retrieval of SV proteins mediated by the clathrin adaptor AP-2 at mammalian central synapses
Source: eLife. 2022 Jan 11;11:e71198. doi: 10.7554/eLife.71198 (PMC8752090; doi:10.7554/eLife.71198)
Supplement: Figure 5—source data 1. [file elife-71198-fig5-data1.xlsx]

## Sheet: Sheet1
			Figure 5B						Figure 5C						Figure 5D					Figure 5E					Figure 5F							Figure 5G						figure 5H							Figure 5I
			vGAT-cypHer Trace		200AP 40Hz				Tau vGAT-cypHer		200AP 40Hz				vGAT-cypHer Trace		50AP 20Hz			Tau vGAT-cypHer		50AP 20Hz			vGAT-cypHer Trace		200AP 40Hz					Tau vGAT-cypHer		200AP 40Hz				vGAT-cypHer Trace		50AP 20Hz					Tau vGAT-cypHer		50AP 20Hz
				WT	AP-2 KO	WT + Pitstop2			WT	AP-2 KO	WT + Pitstop2				WT	AP-2 KO	WT + Pitstop2			WT	AP-2 KO	WT + Pitstop2				shCTRL	shCHC	shCHC+Pitstop2				shCTRL	shCHC	shCHC+Pitstop2					shCTRL	shCHC	shCHC+Pitstop2				shCTRL	shCHC	shCHC+Pitstop2
			0	-0.00391	-0.03711	0.016321			12.27	36.31	13.66			0	0.005987	-0.0129569	0.010181			18.54	53.04	32.56			0	0.011994	-0.00437	-9.13371e-05				26.9	31.38	11.62				0	-0.0294073	0.000478438	-0.0379536				17.19	15.49	9.935
			2	0.004675	0.06756	0.016721			11.01	66.5	37.72			2	-0.01253	0.0148583	-0.00073			13.77	38.32	33.25			2	-0.01272	0.00314	0.00817761				28.41	29.49	9.042				2	0.0233935	0.0185669	-0.0361717				16.11	12.58	18.65
			4	-0.01237	-0.02659	-0.01703			22.21	94.98	10.31			4	-0.01376	-0.0113494	0.012953			25.12	39.27	19.34			4	-0.00497	-0.0124	-0.0205484				46.04	33.46	8.011				4	0.00197754	0.0151608	0.051117				12.29	22.46	11.18
			6	0.031142	0.001641	-0.03604			21.06	26.12	6.573			6	0.004499	-0.0233242	0.011116			11.87	18.15	10.23			6	0.019329	0.008314	0.00808504				37.41	15.24	18.47				6	-0.0199361	-0.0107961	0.0485759				26.23	24.44	18.89
			8	-0.00201	-0.01699	0.009416			14.09	158.2	29.31			8	-0.01462	-0.0314849	-0.00958			44.13	28.36	7.273			8	0.006082	0.034247	0.0279217				16.61	39.08	25.42				8	-0.00505288	-0.00516228	0.0685341				31.5	16.11	17.81
			10	-0.01503	0.045508	-0.00502			11.79	109.2	15.46			10	-0.0105	-0.031514	-0.0039			19.27	22.35	27.83			10	-0.02261	0.022154	0.0514904				37.5	44.88	16.5				10	0.0133639	-0.000891871	0.0308304				21.51	14.87	25.38
			12	-0.01515	-0.05946	-0.02304			18.48	110.3	27.85			12	-0.00413	-0.0814178	-0.04279			14.84	41.59	11.35			12	-0.04342	0.024298	-0.0629233				22.69	19.23	10.11				12	-0.00548674	0.00144779	0.0566146				32.84	53.02	26.93
			14	-0.0468	-0.22801	-0.0918			20.07	580.3	14.01			14	-0.01572	-0.111498	-0.08996			7.181	28.95	15.54			14	-0.05082	0.006853	-0.150776				37.15	17.89	20.97				14	-0.0221452	-0.122152	0.055122				29.85	39.62	14.46
			16	-0.23797	-0.47138	-0.20597			17.5	137.4	29.5			16	-0.09365	-0.298677	-0.25086			8.915	33.98	33.55			16	-0.10415	-0.13856	-0.325043				8.125	10.9	31				16	-0.122536	-0.250863	-0.0598066				27.45	29.21
			18	-0.59332	-0.70617	-0.52914			22.18	69.07	12.12			18	-0.38483	-0.447206	-0.49599			54.05	203	16.49			18	-0.53158	-0.48617	-0.629915				8.048	16.87	35				18	-0.261526	-0.446925	-0.384				25.55	29.43
			20	-0.89207	-0.88001	-0.79005			20.49	115.9	19.99			20	-0.80945	-0.805238	-0.89315			23.81	50.3	21.45			20	-0.82815	-0.81735	-0.852199				17.89	15.13	12.07				20	-0.663836	-0.821895	-0.871915				32.17	12.37
			22	-1	-1	-1				47.35	19.86			22	-1	-1	-1			38.73	32.43	18.06			22	-1	-1	-1				28.17	21.82	9.982				22	-1	-1	-1				30.01	22.42
			24	-0.87742	-0.86493	-0.89719				43.9	20.11			24	-0.8805	-0.922212	-0.95004			13.92	25.94	14.32			24	-0.89733	-0.90846	-0.922984				15.15	16.14	15.82				24	-0.889614	-0.862638	-0.784744				9.698	21.49
			26	-0.82902	-0.84287	-0.81461				27.72	21.17			26	-0.82471	-0.887378	-0.89439			7.848	53.89	15.36			26	-0.80467	-0.82438	-0.822857				22.28	27.09					26	-0.822661	-0.817766	-0.683808				11.71	12.04
			28	-0.77617	-0.82552	-0.73454				51.73	28.17			28	-0.73396	-0.859698	-0.81723			15.56	36.41	24.24			28	-0.73509	-0.7506	-0.74764				15.16	16.68					28	-0.732736	-0.73209	-0.608586				15.02	10.24
			30	-0.63767	-0.79467	-0.64006								30	-0.6723	-0.808718	-0.7217			16.94	46.95	17.98			30	-0.65078	-0.65462	-0.666277				30.67	18.38					30	-0.680778	-0.643627	-0.528804				7.007	13.71
			32	-0.60156	-0.83407	-0.55821								32	-0.55436	-0.760417	-0.65531			17.83	70.99	16.09			32	-0.56629	-0.58572	-0.595209				28.01	22.97					32	-0.582757	-0.618909	-0.516207				19.5	14.65
			34	-0.48955	-0.75335	-0.5401								34	-0.54161	-0.727217	-0.58963			21.51	37.42	19.39			34	-0.52997	-0.52367	-0.49482				13.95	16.56					34	-0.536087	-0.520738	-0.432238				12.06	29.66
			36	-0.45456	-0.70815	-0.44493								36	-0.44919	-0.693827	-0.51694			22.89	238.2	27.75			36	-0.45417	-0.48531	-0.461126				22.77	28.61					36	-0.439415	-0.488246	-0.406694				17.88	14.65
			38	-0.37823	-0.65755	-0.39916								38	-0.38524	-0.667298	-0.47161			22.07	50.49	32.56			38	-0.44102	-0.44475	-0.38817				23.84	33.79					38	-0.359547	-0.394723	-0.274212				22.68	14.65
			40	-0.35314	-0.69482	-0.35358			Tukey's multiple comparisons test	Adjusted P Value				40	-0.36027	-0.613191	-0.40405			13.59	31.46				40	-0.3488	-0.39735	-0.334987				26.89	24.38					40	-0.329126	-0.332584	-0.339383				16.42	12.2
			42	-0.30943	-0.67649	-0.32192			WT vs. AP-2 KO	0.0179				42	-0.30414	-0.590521	-0.35897			19.9	93.5				42	-0.35288	-0.36017	-0.311255				33.54	34.33					42	-0.269999	-0.319646	-0.262884				7.402	9.38
			44	-0.21945	-0.68279	-0.29857			WT vs. WT + Pitstop2	0.9954				44	-0.29447	-0.568537	-0.31602			29.95	83.12				44	-0.30275	-0.31368	-0.277658				44.13	29.88					44	-0.248233	-0.223169	-0.264705					20.56
			46	-0.20871	-0.62855	-0.26218			AP-2 KO vs. WT + Pitstop2	0.0122				46	-0.2391	-0.550508	-0.29167			27.59	27.57				46	-0.25857	-0.307	-0.232832				17.25	36.66					46	-0.251538	-0.232659	-0.243913					15.21
			48	-0.17562	-0.63516	-0.22036								48	-0.21897	-0.524394	-0.26602			18.98	50.28				48	-0.25369	-0.29177	-0.195298				16.85	21.27					48	-0.169439	-0.222091	-0.193904					8.349
			50	-0.19307	-0.60932	-0.18767								50	-0.19965	-0.520843	-0.21188			22.76	60.87				50	-0.23712	-0.23483	-0.195631				18.47	32.96					50	-0.202746	-0.183032	-0.166348					11.29
			52	-0.16596	-0.60052	-0.1573								52	-0.1909	-0.470944	-0.1978			17.65	74.94				52	-0.21244	-0.21273	-0.155412				17.23	32.7					52	-0.185101	-0.147536	-0.154037
			54	-0.15828	-0.58221	-0.14558		n=	11	15	15			54	-0.17468	-0.480767	-0.17492			11.71	50.02				54	-0.18988	-0.21358	-0.169473				15.66	31.96					54	-0.144195	-0.152705	-0.0620638			n=	19	26	8
			56	-0.1078	-0.5606	-0.11119								56	-0.16628	-0.453704	-0.15021			23.7	94.43				56	-0.16304	-0.22061	-0.133016				11.3	44.01					56	-0.153993	-0.127026	-0.0950788
			58	-0.08368	-0.53601	-0.13312		N=3 independent experiments						58	-0.14312	-0.464209	-0.14238			26.32	64.17				58	-0.14249	-0.20088	-0.112238				10.13	10.05					58	-0.133868	-0.136363	-0.107082			N=3-5 independent experiments
			60	-0.09286	-0.54763	-0.16121								60	-0.11087	-0.445801	-0.10271			28.86	42.04				60	-0.15214	-0.17418	-0.139178				15.8	19.47					60	-0.127842	-0.115937	-0.0865233
			62	-0.07579	-0.50929	-0.0822								62	-0.12156	-0.432171	-0.09022			13.51	98.82				62	-0.14721	-0.16411	-0.111962				8.643	18.82					62	-0.121345	-0.0963799	-0.0928227
			64	-0.09991	-0.49247	-0.09887								64	-0.1112	-0.422661	-0.08354			32.51					64	-0.10834	-0.16046	-0.0557715				19.38	11.27					64	-0.0903562	-0.100017	-0.100193
			66	-0.09181	-0.51643	-0.1139								66	-0.09995	-0.403763	-0.07983			33.98					66	-0.1121	-0.14592	-0.0868794				10.83	10.71					66	-0.106007	-0.0802205	-0.196772
			68	-0.07049	-0.54285	-0.09372								68	-0.10283	-0.401988	-0.05578			16.36					68	-0.09874	-0.15416	-0.0817655				13.03	12.9					68	-0.112591	-0.0924052	-0.127404			shCTRL vs. shCHC			p=0,9427
			70	-0.05281	-0.51775	-0.1073								70	-0.10446	-0.382422	-0.0715			15.61					70	-0.10165	-0.14592	-0.0847624				7.943	15.19					70	-0.136565	-0.0989555	-0.139132			shCTRL vs. shCHC + Pitstop 2			p=0,8286
			72	-0.07048	-0.44492	-0.09638								72	-0.09323	-0.368041	-0.05826			10.96					72	-0.09543	-0.13128	-0.103674					19.37					72	-0.102525	-0.146278	-0.15029			shCHC vs. shCHC + Pitstop 2			p=0,9301
			74	-0.07251	-0.44985	-0.08108								74	-0.0778	-0.370235	-0.06807			11.71					74	-0.06434	-0.12638	-0.0540064					15.7					74	-0.101277	-0.0762531	-0.144766
			76	-0.0123	-0.44658	-0.11413								76	-0.08732	-0.370438	-0.04115			21.27					76	-0.06595	-0.10483	-0.0949791					15.36					76	-0.115186	-0.0697279	-0.115132
			78	-0.03634	-0.51051	-0.08727								78	-0.08965	-0.361397	-0.05227			29.66					78	-0.0524	-0.10394	-0.108902					11.39					78	-0.077907	-0.0687492	-0.0827872
														80	-0.11715	-0.3293	-0.04252								80	-0.04981	-0.10017	-0.0740154					20.62					80	-0.0926019	-0.0734942	-0.0837173
														82	-0.0847	-0.341018	-0.05272								82	-0.05288	-0.1104	-0.0500713					15.35					82	-0.113194	-0.0627351	-0.0790484
														84	-0.06093	-0.336529	-0.03332		n=	40	33	20			84	-0.06917	-0.12007	-0.081888										84	-0.0559901	-0.045502	-0.162146
														86	-0.07692	-0.321665	-0.03779								86	-0.03041	-0.12586	-0.0763483			n=	36	42	13				86	-0.100803	-0.0864663	-0.233273
														88	-0.07023	-0.299089	-0.02791		N=5 independent experiments						88	-0.06109	-0.10014	-0.0432879										88	-0.104354	-0.0899951	-0.159705
														90	-0.08464	-0.298765	-0.04087								90	-0.05315	-0.11988	-0.0759361			N=3-5 independent experiments							90	-0.122599	-0.0621072	-0.0641185
			n=	11	15	15								92	-0.12226	-0.316434	-0.02018								92	-0.05385	-0.10372	-0.0781142										92	-0.119246	-0.0656847	-0.155041
														94	-0.11986	-0.317617	-0.04278		Tukey's multiple comparisons test	Adjusted P Value					94	-0.06461	-0.12662	-0.0304239										94	-0.127115	-0.0309992	-0.174064
			N=3 independent experiments											96	-0.10477	-0.281202	-0.04236		WT vs. AP-2 KO	<0,0001					96	-0.06578	-0.1046	-0.0722512										96	-0.124663	-0.0477186	-0.0301898
														98	-0.12085	-0.295997	-0.03989		WT vs. WT + Pitstop2	0.9986											shCTRL vs. shCHC			p=0,8119				98	-0.124296	-0.0538817	-0.162916
														100	-0.12121	-0.278861	-0.02457		AP-2 KO vs. WT + Pitstop2	<0,0001											shCTRL vs. shCHC + Pitstop 2			p=0,3688				100	-0.176031	-0.0253284	-0.138873
														102	-0.12694	-0.292929	-0.03401														shCHC vs. shCHC + Pitstop 2			p=0,1683				102	-0.167208	-0.0678117	-0.0549403
														104	-0.11835	-0.286358	-0.0453																					104	-0.147064	-0.0214003	0.0496105
														106	-0.12071	-0.277242	-0.03833																					106	-0.179756	-0.0260059
														108	-0.11917	-0.243525	-0.04804																					108	-0.0910338	-0.0717929
														110	-0.12781	-0.242392	-0.05056																					110	-0.228708	-0.0668367
														112	-0.12145	-0.186929	-0.06694																					112	-0.1693	-0.0557335
														114	-0.11823	-0.20676	-0.08223																					114	-0.133417	-0.0372352
														116	-0.19513	-0.234297	-0.04866																					116	-0.147989	-0.0688715
														118	-0.1802	-0.233665	-0.02338																					118	-0.183853	-0.107094
																	-1.16952																						-0.713057
																									n=	36	42	13										n=	19	26	8
														n=	40	33	20
																									N=3-5 independent experiments													N=3-5 independent experiments
														N=5 independent experiments
