# Supplementary material for: Clathrin-independent endocytic retrieval of SV proteins mediated by the clathrin adaptor AP-2 at mammalian central synapses
Source: eLife. 2022 Jan 11;11:e71198. doi: 10.7554/eLife.71198 (PMC8752090; doi:10.7554/eLife.71198)
Supplement: Figure 6—figure supplement 1—source data 1. [file elife-71198-fig6-figsupp1-data1.xlsx]

## Sheet: Sheet1
				Figure 6-figure supplement 1A							Figure 6-figure supplement 1B
				VGAT	VGLUT1	SV2	Syt1				VGLUT1	Syt1
				0.921191	0.87555	1.02121	0.754665				1.24253	1.1141
											0.546736	0.900828
				1.13034	1.7985	1.02121	1.61332				0.356485	0.825763
											0.647134	1.11302
				1.14375	1.03584	2.05295	0.715267				0.309152	0.898856
											1.02436	1.01373
				0.955551	0.880704	2.12294	0.887347				0.606086	0.594512
											1.3095	0.723
				1.21904	2.94649	1.46723	1.21744				0.839572	1.35216
											0.824265	0.905147
				1.01604	0.603459		1.9795				0.801499	0.914536
											0.776804	1.11255
					1.6462		1.88999				0.341216	0.725817
											0.668192	0.758068
					2.0376		0.698027				0.639932	1.57022
											0.968671	0.85238
							0.673901				0.562979	0.874351
											0.678978	1.16128
											0.868567	0.771025
			One sample t test								0.643662	0.987019
			P value (two tailed)	0.2383	0.1274	0.0883	0.4001				0.787553	0.630096
											0.514874	0.782198
											0.46247	1.3534
			N=	6	8	5	9				0.884075	0.957168
											0.655642	0.647465
											0.68245	1.56123
											0.966577	0.918461
											0.652169	1.15104
											0.720265	1.62938
											0.594455	1.09228
											0.903736	1.04739
											0.592084	0.919325
											0.431104	1.58693
											0.722581	0.931603
											0.489003	1.3051
											0.530989	1.08485
											0.578946	1.59207
											0.979843	0.911027
											0.605277	1.39254
											0.677655	1.59154
											1.14426	1.185
											0.969682	1.09123
											0.644856	1.45177
											1.39224	1.61945
											0.883101	1.28404
											0.848079	2.106
											1.19373	1.39633
											0.49659	2.14984
											0.225242	1.29973
											0.354799	1.34634
											0.540661	0.80896
											0.458127	0.956681
											0.446986	0.985728
											1.06241	0.562345
											0.562349	0.4463
											0.897594	0.377403
											0.388746	0.973102
											0.401128	0.435644
											0.525921	0.565703
											0.536988	0.388423
											0.834863	1.25219
											0.490163	0.450241
											0.441998	1.35496
											0.378671	0.383242
											0.957372	1.22745
											1.55875	0.498922
											1.12966	0.628105
											1.19883	1.08834
											0.790235	0.403385
											0.512371	0.515854
											1.80046	1.54107
											2.02968	0.475202
											1.75962	0.521109
											1.49876	1.15345
											1.57479	0.496951
											1.47684	0.604531
											1.33022	1.41933
											1.2162	1.37897
											1.39844
											1.39133
											1.94471
											1.91131
											1.68064
											1.86789
											1.66934
											1.53637
											1.50085
											1.8201
											1.93852
											2.49086
											1.04445
											1.24406
											1.52134
											1.27182
											1.19252
											1.55286
											1.42812
											1.194
											1.48334
										Unpaired t test
										P value	0.5318
										n=	99	78
										N=	5	4
