# Supplementary material for: Clathrin-independent endocytic retrieval of SV proteins mediated by the clathrin adaptor AP-2 at mammalian central synapses
Source: eLife. 2022 Jan 11;11:e71198. doi: 10.7554/eLife.71198 (PMC8752090; doi:10.7554/eLife.71198)
Supplement: Figure 6—source data 1. [file elife-71198-fig6-data1.xlsx]

## Sheet: Sheet1
			Figure 6C					Figure 6E					Figure 6G				Figure 6I
		WT	AP-2 KO				WT	AP-2 KO				WT	AP-2 KO				WT	AP-2 KO
		1	1.48919				1	0.911914				1	1.8878				1	2.45646
		1	1.2565				1	0.52				1	1.15536				1	3.29163
		1	1.5127				1	1.28372				1	2.4113				1	2.16893
		1	0.902611				1	1.5961				1	2.47634				1	0.911914
		1	0.484436				1	1.09718				1	1.0956				1	1.25716
		1	0.574874									1	1.91593				1	2.46451
		1	1.43772									1	1.74419
		1	1.28226									1	1.35514
		One sample t test					One sample t test					One sample t test					One sample t test
		P value	0.4456				P value	0.6736				P value	0.0049				P value	0.0279
		N=8 independent experiments
							N=5 independent experiments					N=8 independent experiments					N=6 independent experiments
