# Supplementary material for: Clathrin-independent endocytic retrieval of SV proteins mediated by the clathrin adaptor AP-2 at mammalian central synapses
Source: eLife. 2022 Jan 11;11:e71198. doi: 10.7554/eLife.71198 (PMC8752090; doi:10.7554/eLife.71198)
Supplement: Figure 7—figure supplement 1—source data 1. [file elife-71198-fig7-figsupp1-data1.xlsx]

## Sheet: Sheet1
				Figure 7-figure supplement 1C
				WT	AP-2 KO	AP-2 KO + TTX
				1.2903	1.07712	1.74964
				1.30622	1.585	1.3423
				0.949052	1.90393	1.33623
				1.30216	1.58265	1.17724
				0.666617	1.89571	0.949069
				1.00511	0.630195	1.11237
				0.905171	0.984841	1.70756
				0.964665	0.9822	1.11912
				1.50485	0.697463	0.552608
				0.658988	0.810748	0.888361
				0.817035	1.17826	0.463627
				0.668042	1.76473	0.578323
				1.26754	1.78445	1.68099
				1.17013	2.29417	0.880208
				1.14415	0.774325	0.859093
				1.01712	0.988507	0.634252
				1.10695	0.803621	0.784031
				0.961667	0.795979	0.75202
				1.13139	0.672716	0.698519
				1.02652	1.07929	1.34919
				1.05364	1.33428	0.919525
				1.13617	1.45794	1.31069
				1.12819	0.890767	1.13366
				0.891827	0.729781	1.00408
				1.10862	1.25048	0.876142
				0.686752	1.1119	1.02074
				0.66146	1.15921	1.3632
				0.642724	0.970365	1.58096
				0.938619	0.777978	0.786257
				0.947967	1.00793	1.11474
				1.06317	1.47167	1.6282
				2.03023	1.17187	0.782054
				0.756327	1.24956	0.679189
				1.25189	1.2746
				1.15622	1.36858
				1.22096	1.32421
				1.10595	0.86084
				1.17628	1.2078
				1.30187	0.961568
				0.8108	1.1401
				0.630584	1.52683
				0.675463	1.78869
				0.865608	1.90575
				0.6828	1.82831
				0.592851	2.43466
				0.678968	4.15803
				1.10013	0.925157
				0.617183	1.4512
				1.14465	1.07507
				1.22242	1.94244
				0.980259	1.78201
				1.74613	1.8654
				1.7924	1.65566
				1.22567	0.48356
				1.16843	0.727328
				1.03435	0.949586
				1.12447	0.73411
				1.15417	1.52255
				0.78397	1.54774
				0.757597	1.22727
				0.68727	1.61712
				0.692111	1.61028
				0.556748	2.41831
				0.657202	1.26494
				0.710593	1.22993
				0.844217	1.44141
				1.27751	1.29419
				1.24441	1.75398
				0.516233	1.66388
				0.759357	2.10463
				0.597267	1.51128
				1.33149	1.99388
				1.45857	1.40748
				0.9921	1.4378
				0.772973	1.22993
				0.967084	0.8668
				1.13804	1.01515
				0.67289	0.849167
				0.706449	1.12283
				1.40253	1.26716
				1.16309	1.38807
					1.30401
					1.63281
					1.44567
					1.01761
					1.14709
					1.19223
					1.37146
					1.12628
					1.15893
					1.22371
					1.34135
			n=	81	92	33
			N=	5	5	2
				Tukey's multiple comparisons test	Adjusted P Value
				WT vs. AP-2 KO	<0,0001
				WT vs. AP-2 KO + TTX	0.8004
				AP-2 KO vs. AP-2 KO + TTX	0.0026
