# Supplementary material for: Clathrin-independent endocytic retrieval of SV proteins mediated by the clathrin adaptor AP-2 at mammalian central synapses
Source: eLife. 2022 Jan 11;11:e71198. doi: 10.7554/eLife.71198 (PMC8752090; doi:10.7554/eLife.71198)
Supplement: Figure 7—source data 1. [file elife-71198-fig7-data1.xlsx]

## Sheet: Sheet1
Figure 7
		Figure 7D						Figure 7H
								VGAT
		WT	AP-2 KO					WT	AP-2 KO	AP-2 KO + TTX
		1.37058	0.955801					0.956246	1.34067	1.4052
		0.516718	1.08743					0.829563	1.29683	1.16057
		0.684009	0.8197					0.864568	1.81968	1.53708
		1.52271	0.957215					0.873839	2.04272	1.44236
		1.25121	0.748092					0.93366	1.57591	1.50672
		1.37211	1.21153					1.06967	1.70659	1.37104
		1.41654	1.226					1.17064	2.12623	1.4688
		1.17378	0.848687					1.21469	1.96457	1.45454
		1.49719	1.26844					0.987488	1.83488	1.30104
		1.43693	1.32196					1.10002	2.24903	1.35302
		0.967394	1.10335					0.796284	1.27584	2.59706
		1.47774	1.08786					0.845996	0.859261	1.09357
		0.710736	1.05244					0.763329	5.29488	1.32109
		1.37335	1.00665					0.767528	3.81015	1.23838
		0.339535	1.08982					0.902805	1.05388	0.885776
		0.65189	1.00346					0.667543	2.90393	1.37274
		0.779927	1.04338					0.665807	1.04635	1.7194
		0.974302	1.39088					1.16596	1.34433	0.752052
		1.06882	2.3225					0.904492	0.939342	0.795223
		0.860313	1.1755					2.10749	1.30172	0.760457
		0.844349	1.08832					1.37214	0.799422	0.925263
		0.124203	1.2067					1.04062	0.922895	0.8954
		1.00534	0.68296					0.606673	0.872941	0.939178
		0.213697	0.710176					1.07776	0.940505	0.924331
		1.33217	0.911496					0.856872	1.31891	0.98234
		1.09279	0.674277					1.1732	3.37894	0.997504
		0.853872	0.744641					1.18625	0.932536	0.934706
		0.898676	1.04601					1.10822	0.655752	0.822589
		0.76405	1.48346					1.48785	0.885521	0.829813
		0.710087	0.876461					1.00255	0.750255	0.776757
		0.909786	1.09833					1.01932	1.13378	0.757726
		0.87989	1.12541					0.884064	1.05878	0.76738
		0.799413	1.15494					0.932994	1.08815	0.822897
		1.15312	0.692944					0.91333	1.15915	0.807725
		1.09713	0.788341					0.777801	1.07542	0.750014
		1.07009	0.788892					1.10099	1.10449	0.860897
		1.22332	0.893692					0.892333	1.12982	0.787026
		0.943585	0.679497					1.12592	1.01934	0.792175
		1.10331	0.74265					0.874555	1.47667	0.630681
		0.637275	1.00984					1.25049	1.39842	0.720048
		0.88584	0.966787					0.939058	1.46691	0.705991
		1.11288	1.08201					0.89322	1.27588	0.926271
		1.11159	1.19137					1.01469	1.34863	0.961917
		1.08874	0.808598					0.962031	1.76101	0.751197
		0.842439	0.799897					0.97318	1.8056	0.651239
		0.916561	0.997775					0.650297	1.54164	0.66373
		1.54572	0.975905					1.18862	1.60809	0.627555
		1.13601	1.21515					1.13678	1.52048	0.853146
		1.69863	1.22714					1.13534	1.87185	1.03046
		0.720128	0.858173					1.04855	1.06699	0.783281
		1.10152	1.39772					0.918776	1.25146	0.733993
		0.796323	1.05314					0.856129	1.3311	0.681792
		0.763219	1.6338					1.00984	1.03065	0.638868
		1.36572	1.29354					1.11102	1.16697	0.71465
		0.926132	0.732677					0.930155	1.10806	0.689881
		0.958962	0.745712					0.990977	0.81159	0.928254
		0.802823	0.585114					1.99156	1.71093	0.686339
		1.05543	0.842596					1.12794	1.01562	1.03151
		0.808331	0.881443					1.03101	0.812664
		1.13457	1.00913					1.32801	2.45138
		0.957896	0.627491					0.934525	0.849239
		0.889324	0.751242					0.7445	0.933836
		1.31641	0.765968					0.7445	0.683118
		1.68336	0.647672					0.709172	0.672141
		0.835457	0.683857					0.851881	1.24793
		0.929342	0.728356					0.798093	1.19337
		0.761381	0.822317					0.738803	1.12534
		0.813987	0.748833						1.52784
		1.13457	0.819047						1.47295
		0.957896	0.721568
							n=	67	69	58
		0.889324	0.955585				N=5 independent experiments
		1.31641	0.883572
							Tukey's multiple comparisons test	Adjusted P Value
		1.68336	0.615465				WT vs. AP-2 KO	<0,0001
							WT vs. AP-2 KO + TTX	0.9904
		0.835457	0.441107				AP-2 KO vs. AP-2 KO + TTX	<0,0001
		0.929342	0.301807
		0.761381	0.464991
		0.813987	0.549047
		0.835054	0.396311
		1.06421	0.400413
		0.924299
		0.827891
		0.998954
		0.916822
		0.822342
		1.09552
		0.934931
		1.18187
		0.795764
		1.13007
		1.15253
		0.989399
		1.3613
		Unpaired t test
		P value	0.1519
	n=	83	79
	N=4 independent experiments
