# Supplementary material for: Clathrin-independent endocytic retrieval of SV proteins mediated by the clathrin adaptor AP-2 at mammalian central synapses
Source: eLife. 2022 Jan 11;11:e71198. doi: 10.7554/eLife.71198 (PMC8752090; doi:10.7554/eLife.71198)
Supplement: Figure 8—figure supplement 1—source data 1. [file elife-71198-fig8-figsupp1-data1.xlsx]

## Sheet: Sheet1
			Figure 8-figure supplement 1A					Figure 8-figure supplement 1B						Figure 8-figure supplement 1C					Figure 8-figure supplement 1D						Figure 8-figure supplement 1E						Figure 8-figure supplement 1F					Figure 8-figure supplement 1G
			WT	FV/AA					WT	FV/AA				WT	FV/AA					WT	FA/AA				WT	FA/AA					WT	FV/AA				WT	FV/AA
			1	1.37838				1	0.015474	0.006002				23.5391	82.4095				1	0.020868	-0.02291				31.4459	147.129				1	0.227358	0.221382				0.167824	0.126247
			1	0.797468				2	0.00352	0.000369				20.0776	123.461				2	0.001527	-0.04853				17.8339	181.715				2	0.223317	0.221308				0.151641	0.133984
			1	0.858537				3	0.010424	-0.0063				31.0478	65.1693				3	-0.00264	-0.02961				21.3436	175.242				3	0.222248	0.218688				0.209025	0.149092
								4	0.01356	-0.01078				27.5725	89.131				4	0.002553	-0.03607				16.5078	79.7079				4	0.222458	0.217301				0.193825	0.173958
								5	-0.00042	-0.0038				27.05	75.0207				5	0.004421	-0.0251				27.6699	110.033				5	0.221035	0.21781				0.158664	0.200734
			Unpaired t test					6	-0.0016	-0.00548				32.2122	91.9574				6	-0.01617	-0.02006				22.1456	67.3646				6	0.221515	0.215664				0.174331	0.194337
			P value	0.9534				7	-0.00233	-0.00496				22.4847					7	0.008722	-0.02176				27.9579	153.8				7	0.221471	0.214948				0.144659	0.150402
								8	-0.00323	-0.00316									8	-0.00465	-0.02282				23.9018	201.023				8	0.218934	0.214312				0.196263	0.206369
								9	0.001087	-0.00124									9	-0.00436	-0.01005				17.4444	81.5651				9	0.218746	0.213473					0.200753
								10	0	0									10	0	0				19.8768	165.525				10	0.218895	0.212746
								11	-0.00666	-0.01525				Unpaired t test					11	-0.00674	0.008586				27.5521	116.214				11	0.222021	0.216726
								12	-0.00506	0.001534				P value	<0,0001				12	-0.0291	0.013611				22.815	138.45				12	0.266687	0.264621				Unpaired t test
								13	0.039798	0.011451									13	0.036766	0.022657				17.7036	128.778				13	0.315115	0.314104				P value	0.7781
								14	0.100023	0.049955			n=	7	6				14	0.105976	0.053485				19.8685	138.875				14	0.354809	0.359921
								15	0.16442	0.079044									15	0.155679	0.122687				22.6834	111.704				15	0.383392	0.394326
								16	0.234725	0.108012									16	0.248692	0.165434					96.5633				16	0.403283	0.42195			n=	8	9
								17	0.293123	0.142683									17	0.344711	0.218698					106.223				17	0.403818	0.423806
								18	0.359789	0.178431									18	0.415205	0.277824					102.576				18	0.400248	0.419223
								19	0.410886	0.217609									19	0.485664	0.328986					84.3004				19	0.394747	0.414054
								20	0.462747	0.261838									20	0.553008	0.353546									20	0.389251	0.410217
								21	0.523093	0.297267									21	0.614562	0.415786									21	0.382006	0.404424
								22	0.573763	0.322123									22	0.66511	0.432359				Unpaired t test					22	0.378786	0.400798
								23	0.628133	0.364952									23	0.715412	0.472703				P value	<0,0001				23	0.367659	0.396744
								24	0.681058	0.403007									24	0.760808	0.527443									24	0.363437	0.392016
								25	0.719995	0.42904									25	0.783082	0.558436			n=	15	19				25	0.355527	0.389323
								26	0.761481	0.47523									26	0.813063	0.581765									26	0.347934	0.386276
								27	0.803968	0.510251									27	0.842043	0.605752									27	0.342611	0.381256
								28	0.827346	0.540552									28	0.876263	0.637211									28	0.335898	0.379444
								29	0.873112	0.581797									29	0.888847	0.656998									29	0.330854	0.37483
								30	0.892335	0.609724									30	0.925573	0.683518									30	0.326193	0.37331
								31	0.917932	0.646305									31	0.917435	0.709176									31	0.299908	0.360292
								32	0.943206	0.668101									32	0.943353	0.742026									32	0.189007	0.178677
								33	0.950614	0.696755									33	0.928076	0.764754									33	0.180693	0.174059
								34	0.968846	0.728221									34	0.95699	0.756937									34	0.174288	0.170455
								35	0.985227	0.752143									35	0.974645	0.797382									35	0.168605	0.167445
								36	0.994159	0.77193									36	1	0.82094									36	0.175728	0.165324
								37	0.988231	0.797102									37	0.972836	0.826375									37	0.250985	0.33129
								38	0.996013	0.830392									38	0.998244	0.855455									38	0.251949	0.333183
								39	0.99413	0.837343									39	0.981913	0.876799									39	0.250628	0.332774
								40	0.998826	0.85589									40	0.976637	0.869125									40	0.249131	0.331927
								41	1	0.870381									41	0.986945	0.87661									41	0.246893	0.330944
								42	0.992953	0.889842									42	0.9659	0.898797									42	0.246233	0.327921
								43	0.989518	0.902798									43	0.974281	0.920234									43	0.243428	0.327677
								44	0.988336	0.920123									44	0.982649	0.913882									44	0.242473	0.324405
								45	0.976494	0.930855									45	0.95926	0.930246									45	0.239913	0.324105
								46	0.984517	0.933706									46	0.957504	0.941081									46	0.327454	0.320895
								47	0.979892	0.955079									47	0.964991	0.950579									47	1.00096	0.942619
								48	0.975662	0.960236									48	0.930823	0.948299									48	1.00235	0.997965
								49	0.969176	0.967641									49	0.935408	0.95717									49	1.01083	1.004
								50	0.965514	0.97534									50	0.922181	0.982731									50	1.00466	1.00303
								51	0.952187	0.980376									51	0.907526	1									51	1.00176	1.00029
								52	0.935919	1									52	0.908433	0.994284									52	0.993585	0.996682
								53	0.898642	0.991672									53	0.873253	0.988718									53	0.984203	0.992301
								54	0.852887	0.981777									54	0.806801	0.978034									54	0.97718	0.987945
								55	0.809302	0.96804									55	0.772058	0.974082									55	0.967894	0.982611
								56	0.756343	0.954232									56	0.71556	0.951616									56	0.863806	0.929875
								57	0.724618	0.945139									57	0.654125	0.928996									57	0.232295	0.385289
								58	0.695083	0.936441									58	0.641147	0.934901									58	0.201577	0.288307
								59	0.644654	0.918125									59	0.569784	0.91783									59	0.192702	0.279084
								60	0.602201	0.909503									60	0.536542	0.897551									60	0.18715	0.274334
								61	0.566771	0.898851									61	0.5004	0.898562									61
								62	0.533363	0.8879									62	0.464849	0.884519									62
								63	0.505968	0.882177									63	0.437025	0.881637									63
								64	0.487366	0.86769									64	0.410059	0.876576									64
								65	0.452857	0.862696									65	0.411338	0.85672									65
								66	0.428784	0.852882									66	0.351921	0.851448									66
								67	0.407303	0.844211									67	0.335389	0.847012									67
								68	0.38496	0.832922									68	0.322988	0.84582									68
								69	0.360919	0.817606									69	0.29864	0.831493									69
								70	0.346556	0.816346									70	0.295314	0.807123									70
								71	0.33186	0.806323									71	0.26595	0.801918									71
								72	0.313117	0.796933									72	0.244787	0.797282									72
								73	0.304489	0.789392									73	0.247105	0.8078									73
								74	0.284454	0.787655									74	0.229496	0.813673									74
								75	0.269232	0.777975									75	0.210506	0.782325									75
								76	0.262887	0.76804									76	0.187647	0.799301									76
								77	0.250507	0.746422									77	0.18813	0.781963									77
								78	0.233943	0.744113									78	0.177631	0.773707									78
								79	0.227238	0.737558									79	0.163169	0.784484									79
								80	0.22477	0.736896									80	0.14549	0.772126									80
								81	0.213528	0.716083									81	0.155021	0.765231									81
								82	0.197441	0.713528									82	0.143776	0.75294									82
								83	0.185576	0.707455									83	0.139171	0.750295									83
								84	0.182085	0.698092									84	0.121614	0.749891									84
								85	0.17481	0.693393									85	0.101249	0.72573									85
								86	0.170923	0.684803									86	0.110796	0.716651									86
								87	0.158075	0.685323									87	0.095357	0.722693									87
								88	0.149942	0.668651									88	0.087953	0.711865									88
								89	0.145281	0.668131									89	0.08462	0.71308									89
								90	0.14217	0.651588									90	0.073315	0.706285									90
								91	0.140741	0.641362									91	0.07435	0.680777									91
								92	0.13587	0.62944									92	0.054827	0.692638									92
								93	0.129212	0.623906									93	0.053563	0.682335									93
								94	0.128791	0.624205									94	0.059724	0.667923									94
								95	0.126343	0.617145									95	0.033238	0.65004									95
								96	0.115102	0.604233									96	0.060148	0.672437									96
								97	0.106161	0.591302									97	0.042017	0.646153									97
								98	0.103142	0.5923									98	0.036045	0.641125									98
								99	0.1038	0.5905									99	0.031264	0.645149									99
								100	0.099803	0.571657									100	0.027239	0.63647									100
								101	0.097323	0.565026									101	0.009204	0.6388									101
								102	0.090116	0.558302									102	0.01159	0.634716									102
								103	0.091511	0.541889									103	0.015399	0.628783									103
								104	0.086791	0.538987									104	0.003334	0.613563									104
								105	0.08443	0.535038									105	0.011572	0.610789									105
								106	0.071839	0.53605									106	0.000214	0.618354									106
								107	0.073052	0.523737									107	0.011712	0.6045									107
								108	0.06448	0.522899									108	0.007639	0.623116									108
								109	0.065206	0.511414									109	0.004116	0.611221									109
								110	0.063062	0.497788									110	-0.00338	0.598425									110
								111	0.059716	0.490802									111	-0.00978	0.608047									111
								112	0.058135	0.494859									112	-0.01625	0.614961									112
								113	0.061285	0.488251									113	-0.02317	0.590239									113
								114	0.050707	0.488324									114	-0.01045	0.597245									114
								115	0.048757	0.477665									115	-0.01224	0.60386									115
								116	0.045573	0.473132									116	-0.02747	0.56803									116
								117	0.043522	0.467761									117	-0.03595	0.575271									117
								118	0.041841	0.458817									118	-0.02349	0.56928									118
								119	0.039508	0.45681									119	-0.03476	0.570468									119
								120	0.037801	0.452509									120	-0.02628	0.588794									120
								121	0.032751	0.446895									121	-0.0336	0.554346									121
								122	0.037895	0.434707									122	-0.04367	0.560685									122
								123	0.030815	0.438535									123	-0.04997	0.565225									123
								124	0.027066	0.428094									124	-0.06502	0.5337									124
								125	0.025874	0.422628									125	-0.04004	0.553813									125
								n=	7	6									n=	15	19
