# Supplementary material for: Clathrin-independent endocytic retrieval of SV proteins mediated by the clathrin adaptor AP-2 at mammalian central synapses
Source: eLife. 2022 Jan 11;11:e71198. doi: 10.7554/eLife.71198 (PMC8752090; doi:10.7554/eLife.71198)
Supplement: Figure 8—source data 1. [file elife-71198-fig8-data1.xlsx]

## Sheet: Sheet1
			Figure 8C					Figure 8D							Figure 8E							Figure 8F								Figure 8G
								VGLUT1 pHluorin Trace							VGLUT1 Tau							VGAT pHluorin Trace								VGAT Tau
			WT	FV/AA				WT - WT	WT - FV/AA	AP-2 KO - WT	AP-2 KO - FV/AA				WT - WT	WT - FV/AA	AP-2 KO - WT	AP-2 KO - FV/AA					WT - WT	WT - FA/AA	AP-2 KO - WT	AP-2 KO - FA/AA				WT - WT	WT - FA/AA	AP-2 KO - WT	AP-2 KO - FA/AA
			1	0.162011			0	0.015597	0.051362	0.076422	0.11029				6.031	30.4	24.7	40.95				0	0.055057	0.015595	0.01322	0.01065				14.34	68.34	122.5	57.7
			1	0.266023			2	-0.00228	-0.0058	-0.01377	0.026967				7.034	42.85	37.97	19.4				2	0.001415	0.052276	0.009854	0.006907				5.99	49.73	45.72	23.21
			1	0.123605			4	-0.02061	0.008552	0.018166	-0.03014				7.826	26.32	24.16	18.87				4	-0.00952	-0.00777	-0.00423	-0.01041				10.22	34.53	79.88	20.12
							6	0.005266	-0.02455	-0.03041	-0.01675				12.19	42.52	21.25	35.68				6	-0.01587	-0.0097	-0.05476	-0.02656				17.98	49.82	72.94	32.48
							8	0.002025	-0.0182	-0.02879	-0.007684				11.79	31.12	25.7	50.63				8	-0.02977	-0.02619	-0.0295	-0.00125				13.09	24.25	45.62	33.11
							10	0.41194	0.26947	0.407679	0.392355				7.083	22.74	31.92	29.87				10	0.347292	0.320066	0.299376	0.321025				24.04	43.9	28.18	43.17
			Unpaired t test				12	0.811876	0.751355	0.761012	0.826752				18.4	17.35	23.34	48.55				12	0.754747	0.697559	0.692598	0.692799				19.1	41.44	46.55	58.44
			P value	<0,0001			14	1	1	1	1				11.79	26.8	28.07	36.12				14	1	1	1	1				12.28	22.48	43.59	29.71
							16	0.857999	0.844377	0.874332	0.878796				9.56	30.86	25.23	42.95				16	0.868998	0.834659	0.857551	0.74703				8.807	59.64	70.26	85.48
							18	0.741608	0.809341	0.810475	0.79986				10.07	27.44	25.78	29.16				18	0.775132	0.783918	0.804958	0.72283				12.35	40.13	49.08	118.8
							20	0.617126	0.746441	0.759222	0.749591				16.66	25.69	22.71	30.64				20	0.660288	0.775629	0.769862	0.708743				21.12	79.77	86.31	65.1
							22	0.518974	0.697385	0.736452	0.719739				14.84	45.13	22.98					22	0.568161	0.659879	0.707335	0.639106				20.37	15.83	20.12	56.89
							24	0.43134	0.663495	0.646465	0.715591				21.41	30.07						24	0.497618	0.639382	0.656349	0.632239				14.17	25.82	14.81	98.05
							26	0.365173	0.620892	0.614517	0.614482				23.27	22.44						26	0.432469	0.635278	0.644397	0.622309				11.22	42.83	28.39	75.46
							28	0.319024	0.577547	0.529485	0.634676				24.51	28.03						28	0.375694	0.6595	0.60487	0.644791				9.683	23.54	19.79	69.49
							30	0.291818	0.522534	0.511028	0.585655				34.59	21.45						30	0.351949	0.621655	0.5909	0.581252				12.1	71.53	43.58	54.41
							32	0.240563	0.493921	0.449131	0.509111					28						32	0.295175	0.624033	0.590369	0.568467				11.03	110	26.2
							34	0.231806	0.482436	0.442964	0.514031					37.51						34	0.289832	0.635383	0.532976	0.598495				14.94	97.68	20.19
							36	0.1702	0.447772	0.406701	0.529111											36	0.272535	0.490696	0.514141	0.551564				21.24	40.39	30.17
							38	0.1308	0.423267	0.378057	0.446555			n=	16	18	12	11				38	0.240506	0.481624	0.512672	0.460319				22.27		24.34
							40	0.148099	0.413657	0.356885	0.40707			N=5 independent experiments								40	0.207668	0.461856	0.469055	0.559508				16.84		41.66
							42	0.114346	0.385798	0.309468	0.398995											42	0.20285	0.481448	0.458376	0.558874				27.08		35.93
							44	0.11366	0.363927	0.271935	0.359337											44	0.145802	0.468451	0.44577	0.529407				36.67		58.44
							46	0.122198	0.345704	0.269539	0.374467											46	0.128748	0.451979	0.459756	0.529674				45.76		56.44
							48	0.114863	0.297613	0.272137	0.320837				Tukey's multiple comparisons test	Adjusted P Value						48	0.13736	0.474749	0.406541	0.564763				38.52		60.75
							50	0.101333	0.292393	0.248768	0.282514				WT - WT vs. WT - FV/AA	<0,0001						50	0.133048	0.466324	0.407014	0.507334				17.62		55.4
							52	0.086411	0.262466	0.197135	0.310349				WT - WT vs. AP-2 KO - WT	0.0023						52	0.10531	0.381088	0.380321	0.427484				32.07		26.28
							54	0.055749	0.240762	0.204047	0.337598				WT - WT vs. AP-2 KO - FV/AA	<0,0001						54	0.116006	0.373682	0.373363	0.430967				16.55		31.95
							56	0.048494	0.230701	0.176854	0.276589				WT - FV/AA vs. AP-2 KO - WT	0.5996						56	0.125575	0.344343	0.388299	0.430626				31.04		101.1
							58	0.047853	0.201414	0.159078	0.332722				WT - FV/AA vs. AP-2 KO - FV/AA	0.3592						58	0.110967	0.413912	0.370819	0.445653				7.168		48.58
							60	0.048264	0.214648	0.187623	0.290446				AP-2 KO - WT vs. AP-2 KO - FV/AA	0.053						60	0.10929	0.367407	0.346946	0.45154						33.97
							62	0.062327	0.195777	0.18584	0.286099											62	0.088919	0.332583	0.353556	0.428489						30.67
							64	0.051559	0.166775	0.178905	0.281089											64	0.073204	0.318112	0.35071	0.409717						26.15
							66	0.052904	0.177963	0.167051	0.227574											66	0.078136	0.317385	0.325007	0.448517						17.57
							68	0.023709	0.156057	0.154824	0.238361											68	0.078859	0.314591	0.301313	0.385521						40.3
							70	0.044464	0.149201	0.098371	0.210613											70	0.091012	0.309689	0.289365	0.363136						30.83
							72	0.04325	0.179794	0.110203	0.248231											72	0.074216	0.275747	0.290244	0.382372						50.59
							74	0.063475	0.132948	0.069919	0.202677											74	0.080463	0.34747	0.286411	0.38834						136.2
							76	0.040137	0.128709	0.114448	0.158205											76	0.081079	0.322298	0.280342	0.39525						71.5
							78	0.018831	0.143661	0.092139	0.199736											78	0.076209	0.322802	0.296148	0.368253						25.39
																						80	0.079782	0.30831	0.267175	0.355365						59.1
																																35.22
							n=	16	18	12	11
							N=5 independent experiments
																						n=	30	19	42	16				30	19	42	16
																						N=6 independent experiments								N=6 independent experiments
																														Tukey's multiple comparisons test	Adjusted P Value
																														WT - WT vs. WT - FA/AA	0.0001
																														WT - WT vs. AP-2 KO - WT	<0,0001
																														WT - WT vs. AP-2 KO - FA/AA	<0,0001
																														WT - FA/AA vs. AP-2 KO - WT	0.9878
																														WT - FA/AA vs. AP-2 KO - FA/AA	0.7439
																														AP-2 KO - WT vs. AP-2 KO - FA/AA	0.4561
